# Supplementary material
Source: PubMed Central journal article supplement (PMC4032224)

## SUPPLEMENTAL MATERIAL

**Supplemental Figure S1. Hierarchical Cluster Analysis of Gene Expression.** Unsupervised hierarchical cluster analysis of Pearson-correlated normalized  $\Delta\text{Ct}$  values using average linkage was performed on the array gene dataset (n=448) for five eye regions. Data are from six orbs obtained from three individuals, see Supplemental Table S1 for donor information. The heatmap colors reflect the row-normalized Z-scaled scores for gene expression, where blue to white color gradient indicate genes expressed at lower relative expression levels (-1 to <0) and pink to red color gradient indicates those expressed at higher levels (>0 to +1). In B, heatmaps depicting a subset of the clustered genes (n=80, horizontal labels) from panel A which display the greatest differential expression between the cornea and retina. In (C), the hierarchical cluster analysis and differential expression of TransPortal genes (horizontal labels, n=27) in all eye regions is shown. The red to white color gradation in the heatmap indicates the genes expressed at the lowest (red) and highest (white) levels, respectively.

**Supplemental Figure S2. Ingenuity Pathway Analysis of Herpetic Stromal Keratitis (HSV).** IPA analysis of candidate genes involved in the development of HSV and corneal remodeling identified several nodes regulated by key hubs *HNF4A* and *IL1B*, which include *SLC22A7* (OAT2) and *ABCG2* (BCRP). Highly expressed genes (nodes) are indicated by pink to red color, while nodes with lower expression levels are shown by green color. White nodes indicate canonical pathway nodes or hubs. Edges (lines) represent relationships among nodes and hubs, where dashed lines indicate up or down regulation of gene expression, solid lines represent direct protein-protein or gene-protein interactions, and weights representing the nature of the relationship between the nodes. Red colored edge lines highlight the relationships of OAT2 with the major nodes and hubs within the network. All edges are supported by at least one reference

from the literature, from a textbook, or from canonical information stored in the Ingenuity Knowledge Base.

**Supplemental Figure S3. Determination of BCRP antibody specificity in the retina.** (A) Negative control in which primary antibody was omitted from the IHC method. (B) BCRP primary antibody after pre-incubation with recombinant BCRP protein overnight at 4°C (pre-absorbed) prior to incubation with tissue. Minor non-specific positive staining is detected in the outer plexiform layer. (C) BCRP primary antibody without pre-absorption. The pattern of BCRP expression here appears very similar to that depicted in Figure 4D. The difference in positive staining observed in (B) and (C) indicates that the antibody used to detect BCRP protein in the retina is specific to BCRP.

**Supplemental Table S1.** The characteristics of the eye donors

| Use              | Sex | Age | Race      | Comorbidities              | Concomitant medications                                                                 | Smoking | Recreational drug use | Source |
|------------------|-----|-----|-----------|----------------------------|-----------------------------------------------------------------------------------------|---------|-----------------------|--------|
| RT-PCR           | F   | 88  | Caucasian | COPD; age-related dementia | Coumadin, Lopressor, Milk of Magnesia, Tylenol, Advair, Protonix, Folic acid            | None    | None                  | SDEB   |
| RT-PCR           | F   | 58  | Caucasian | Non-Hodgkin's Lymphoma     | Septra, Multivitamin, Fish oil, Fluconazole, Acetaminophen                              | None    | None                  | SDEB   |
| RT-PCR           | F   | 52  | Caucasian | Metastatic lung cancer     | Berztopine, Oxybutin, Domipramine, methadone, Seroquel, Levthyroxin, Setaline, Morphine | Yes     | None                  | NDRI   |
| Cornea Histology | F   | 47  | Caucasian | Stroke; Depression         | None reported                                                                           | Yes     | None                  | NDRI   |
| Retina Histology | F   | 78  | Hispanic  | Sebaceous gland carcinoma  | None reported                                                                           | Unknown | Unknown               | UCSF   |

F, female; COPD, chronic obstructive pulmonary disease; SDEB, San Diego Eye Bank; NDRI, National Disease Research

Interchange; UCSF, Department of Ophthalmology, University of California San Francisco

**Supplemental Table S2.** The genes analyzed and their respective PCR primers.

| <b>Gene Symbol</b> | <b>Forward Primer</b>      | <b>Reverse Primer</b>           |
|--------------------|----------------------------|---------------------------------|
| ABCA5              | CCAAACAGCACATGTGGCGAGCA    | ACAGACAGCCTCTGCCTCCTCCAT        |
| ABCB9              | TGAGTCTGGCCAGGGCGGGT       | AGGGGCGAAAGCGCTGGGTG            |
| ABCE1              | ATTTTGGCCGGTGGCCGTGAGAA    | CCAGCTCTTCTGGAGAAAACGATCCC<br>C |
| SLC10A5            | AGACAGTCTACTCCAGGCACCAATGC | TGCGCCTCAGGCAATGCCACAA          |
| SLC11A1            | CGCCGTGGCGGGATTCAAACCTTCT  | TGCAATGGCCGTGCCGATGACTT         |
| SLC12A5            | TAACCGCACGCTGTCTCGCCAT     | ACAGGTGGCGTTGAGGAAGCGA          |
| SLC12A6            | AAAGCGAAGATGCCCCGCGCT      | TGCACTTTCGCCACACCTTGTGC         |
| SLC13A3            | AGGAGACAAGCAAGGAAGGCCGC    | GCGATTCGCCGGTGCAGGTT            |
| SLC13A5            | CTGCCATCTTTGCCTCCATGGTGAA  | AGGTGGCCCATTGGCTGGGTTT          |
| SLC14A1            | AGGGGGCATTTCCTGGGAGCCA     | GCCGTGAACAGGGCACAGCCA           |
| SLC15A4            | ACAACCACTCCTCACACGCTCCCT   | TGCAGCAAAGGCCGAGCACATGA         |
| SLC16A10           | AACTCGCGTCCCTCGCGCTT       | TGGCCGCCAGCATCACCAGC            |
| SLC16A11           | AAGCGCCCAGGACACTGCGT       | AGGGCCAACCAAAGCCAGCG            |
| SLC17A3            | CTGCTCGCTATGGAATAGCCCTCGT  | GCTGGGATTGAGGGCTTGTGCTGT        |
| SLC17A8            | ATGCAGGGGCAGTGGTTGCCAT     | TGTTGGATGAGCTGCTGGGCACT         |
| SLC18A3            | TGCACTCGCTGGGCTTTGAGCA     | TTGCGGTGGCTCATCAAGCAGCA         |
| SLC1A5             | TTGGGACCTCTTCCAGTTCCGCCA   | AATGAACACTGCGGCCACGCAC          |
| SLC22A17           | ACCACCAACGCCATCGGCCA       | CGCACAGCTCCAGGCGCATCA           |
| SLC22A23           | TGCTCACCAACGCCGAGCTCAA     | ACATGGCCTTCATGCCGTTGGC          |
| ABCA10             | GGGCAGCAGCAAATGTGGCAGATA   | ATGGCCATACGGTCACACACAGCC        |
| ABCA6              | TGCTGTGGCCCATGCTGACGTT     | ACTGCCTGGATTGCCTGCCACAT         |
| ABCA7              | AGCGCTTGGGAGACAGGCAGTT     | TGTGGCAGGAGTTGGCTTCGGT          |
| ABCA8              | GCCATCACACGGTTAGTGGATGCG   | TTCTAAAGGTGGCCCGGATGGCCT        |
| ABCB10             | TCCCTGGCACAAGCCACTCAGCTA   | TCCGGAGAGCCCAGTTGCTCCAAA        |
| ABCB7              | TCGCGATGCATTCTTGGCGCT      | TGGCCATACCTGGAGAGCCTTTGC        |
| ABCB8              | TACAACACGGTCGTCGGTGAACGG   | AATTACCAGCACCGTGCGGCCT          |

|          |                             |                           |
|----------|-----------------------------|---------------------------|
| ABCC9    | ATTGGGTGGGGGAGCCAAAGCTCA    | TCCCGCCGCGAGTCTGAAACAA    |
| ABCD2    | GGCAAACCTGGTGGCAGAGGAAGCA   | GCCATCCTCACCATCTGCAAAGCC  |
| ABCF2    | AGCGGGCCATGCTGGAGAAAGA      | AAGAGGGCTCTGGCAAGGGCAA    |
| ABCF3    | GTCACCGCTACACATGCGCCTT      | TGTGCAAGACGCCGGTCACGTA    |
| SLC10A3  | ACCATCAAGAACCTCGTGGACGCC    | TTTTCCGAGAAGTGGGCCAGGTCTG |
| SLC10A4  | GACGGCGACATGAACCTCAGCATC    | GCGAATGAAGACGCCCAACCCGAT  |
| SLC10A6  | TGGTCGCAGTTGCTGGTGTGGT      | TCCTGCACCTTTGCCAAGACTGGT  |
| SLC10A7  | AGGGGTGAATGGGGGACCACTGAA    | AGACACAGGCGGAGGCATGCAA    |
| SLC11A2  | AAGTGGTCACGCTTTGCCCGAGT     | ATCCGCCAGCCTAGTCCATTGGCA  |
| SLC12A1  | TGGAATGGGAGGCAAAGGCCCA      | ACCCTTTGTGAAGCGTGGCCCAA   |
| SLC12A2  | TGGCAAGACTGCAACTCAACCACTGT  | GCAAAGTAGCCATCGCTCTCCGGT  |
| SLC12A3  | AGCACCTTCTGCATGCGCACCTT     | TGCAGGTGTCTGCCTTCCTGCTTG  |
| SLC12A4  | TGCGCCTTGAGGCCGAGCATAA      | TTGTCAGCCCCCACTGCAGACTCA  |
| SLC12A7  | AGCATGAAGCCGGACCAGTCCAA     | TGGGAGGACCTGGCATGTTGAGCA  |
| SLC12A8  | TTGCTGTTCCCTGCTGGCCGTGT     | TGAAGCCGGCCATGACTCCTGT    |
| SLC12A9  | AGTTTTGTGGCTGTGGGGCCGA      | TCAGCATAGCCAGCGCCCAAGT    |
| SLC13A1  | AAATCCTGCATGGCTGACGCTGGG    | TGAGTGGCCTCGACCTCTGCTTCT  |
| SLC13A2  | TTTCGAGAGCCCAGGGGAATGCCA    | ATGAAGCCCAGGATTAGCGGGGCA  |
| SLC13A4  | AGGCCTCGTGTGCTTACGTGCTGA    | TTGAAGTACTCCGCCGCCACCTCA  |
| SLC14A2  | TGGCTTCAACAGCACCCCTCGCA     | TGCAGGGCGGCAATCCAAACACA   |
| SLC15A3  | ACCTCCGTCATTGTGGCAGGAGTC    | ATGGACAGTGGTGCCGCGTTGTA   |
| SLC16A12 | TGCACACGGGCAGTCACAAGATGT    | TGCAAGCAAGCCACCCAGCATGA   |
| SLC16A13 | TTGTGGCGGCGTTTGAGGAGCA      | AAAGCCCAGCCAGAGCCTGACA    |
| SLC16A14 | ACCTGGACTGAGGCGTCGAGCTTT    | TCCAAGATTTTTCGCCCGAGGCC   |
| SLC16A4  | TTTGTGCAGGTCCCCTGGTTGCT     | TCAGTCCCATCCCAGAACGGGCAA  |
| SLC16A5  | GCCCGTGCGAGCGGTACAAAGAAA    | TGCCAATGTGGCTGCTGCCTGT    |
| SLC16A6  | TTTTCAGCTCCCCTCGCCACAGT     | GCTGGTGCGAAAGCAAACACAGCG  |
| SLC16A7  | TGGCCCTCCTCTTGCAAGTAAATTGGT | TGCCAATGAGCAGCCACACGCT    |
| SLC16A8  | AGAAGGAGACTTGGGAGGCAGCGA    | GCGGAAGAAGACGCTCACGGCTTT  |
| SLC16A9  | GGCTTGCTTGCAAGTCCTGTCTGC    | TCAACATCAGGCCTCCAGCCACCA  |

|          |                          |                          |
|----------|--------------------------|--------------------------|
| SLC17A1  | TCCCGAATCAGTGGGTGGAGGCAA | AGGCACGCACGCTGTGCTGTTAT  |
| SLC17A2  | AAGCCTGCCACCAGGAAAGGTCCA | TTGAAGGCATCTGCAACAGGCCCC |
| SLC17A4  | ACTTGCTGGTGGTCTCCTCTGCCA | AGCCTGGTGAACAGTCCTGCTGAG |
| SLC17A5  | TGGCACTGCTGTCCTCACCTGT   | TGTCCCAAGCTGTGCTCCTGCAT  |
| SLC17A6  | TTCAACTGGGACCCGGAAACCGTG | GCAGCTCCGAAAACCCTGTTGGCT |
| SLC17A7  | AGCTTTGGCATCCGCTGCAACCT  | AACTGGGCTTTCTGCACCACCACG |
| SLC1A1   | ATTGCTGTGACTGGCTCCTGGAC  | CCCGTCCCAAAGCATCACCAAGG  |
| SLC1A6   | AACCATCAGCATCACGGCCACAGC | AAGCTCCAGCTCCCGCTGAGACAA |
| SLC1A7   | ATCACAGCCACTGCAGCCAGCAT  | GCAGCAGTTTCTCGGTGCCTGTGT |
| SLC20A2  | AGCACCAGTGCTCGGCCTTGTT   | TCCGCATCCACGGACACACGAA   |
| SLC22A10 | TGCGTGTGGCTTTGGCATGTCTG  | AGCTCTTGCCCTGAGAACAGTGGG |
| SLC22A11 | ACCCTGCGTGTGGTCTTTGCTGTG | TGCTGTCATCCGCACTGGCGTT   |
| SLC22A13 | TCACCACGGTCCCCCAAATCAGT  | AAGCAAGGCTGGTCTTGCCCTGT  |
| SLC22A14 | ACCCCAAGCACCCAATGGCAGTT  | AGGGTAGCGGCCATCTTGTCAGT  |
| SLC22A15 | AACTCGCTTCCTGGTGGGCATGA  | AGGCCGCAATCGATCCTGCAA    |
| SLC22A16 | TCCCGCCTACACCTTCGTGTGCAT | CGCTTCCCACAGCCAGCGATCTTA |
| SLC22A20 | ACATGTTTGTGCCAGAAGGCACGC | ATTGCGGTGGCCCCAAAGCTCA   |
| SLC22A25 | GCTTCTTGGCTGGGGCTGCTACAT | CAGACTCTGCCAGCCACCTTGAGA |
| SLC22A4  | TCCACCGTCGTGACCGAGTGAAT  | ACAGCCATGGTTGCGAAGAGAACG |
| SLC23A1  | GCCGGACACAGCATGAAACCACCA | TGGTGATGCCACGCACGTGAA    |
| SLC23A3  | TGGCTCTGCAGCATGTCTTGGTCA | AGTTTCCAGGTGTCTGGATGGCCC |
| SLC24A1  | AACAGCACCATCCGCAGCACCA   | TCAGCCACATCTTCCTGACCGCCT |
| SLC24A2  | TGCAGAAGCCCAGACCGCTGAT   | TGCGCCCACCAGACCATCAAGT   |
| SLC24A3  | TGCTGGGCAGGTTGTGGCTCTT   | TGCGTTCGAGTTGCTGCTGT     |
| SLC24A4  | AAGGCCTTGGGGACATGGCAGTCT | TTAGGTGGATGCCGAGGACGGTGA |
| SLC24A5  | ACGTCTCCAAGGGCCACAGGAAA  | TTCAGGAGCTGAACTGCCCGCT   |
| SLC24A6  | CCGCAAGGTGTGTGGCCTGAATGT | AAGGTGACGCCTGCCACGTTGT   |
| SLC25A1  | TTGTGCGGGAACAAGGGCTGAAGG | AAGACACTGGCTGCGCCTGCAA   |
| SLC25A10 | TGCAACCATGGCATCCAGCCGA   | GCGCAGTGGAAAACGCCCTGAT   |
| SLC25A11 | TGGCCGGGATGGGAGCTACAGTTT | TCAGGCGCTCAAACAGCACGGT   |

|          |                            |                           |
|----------|----------------------------|---------------------------|
| SLC25A12 | AGGGACTGCAGCTCGAGTGTTTCG   | TGCAAACGTGGCTGTGGCGA      |
| SLC25A14 | GGCCGTGATTGTAAGCGGACACCA   | GCGAAACAGCGCATGGAACATCCC  |
| SLC25A15 | GGGTACCAGTCCAGCACTAATCGCCA | GCGGCTGCATTCTGCAGATCACTCA |
| SLC25A16 | TGGCTGGATCCATGGCAGGTATGACA | GGGTAGGAGCATGGGAAAGCCCAA  |
| SLC25A17 | AGCCGTGGGAAGCGTGACAGCAAT   | ACCACCCTCGATATGGTGCCAGGA  |
| SLC25A18 | TGGCCAAGACTCGCCTGCAGAA     | GGTTCCGCTGCATCCCATCTTCCA  |
| SLC25A19 | AGCTCAGGGTGAGCCCAAGGTCTA   | AAGAGAACTGCAGCCCGGCGTA    |
| SLC25A2  | ATTTGCTGCACTGGCTCTCTGCC    | AGAAGCCCAAGGGGCCATCCTTT   |
| SLC25A20 | ATGGCCGACCAGCCAAAACCCA     | TGCAGTCGGACCTTGACCGTGT    |
| SLC25A21 | AGGGCCTCAACCAGTTCCTGGAGA   | CTGCACCACCTGGTCCAAGTCTCA  |
| SLC25A22 | TGCAGAACCAGCAGAACGGCCA     | AAGTTCACAGCAGCTCCCCGGT    |
| SLC25A23 | CCTGTGGCGCGGCAATGGTATT     | AGCCGCGTCTTCAGCACCTCCATA  |
| SLC25A24 | CGCATGCAGGCTCAAGCCATGTT    | TGCCTACAGCAGGGAGCACCTTCA  |
| SLC25A25 | ACCCCGTGGAACATCCCCGA       | AGGCATGGACCTGCATGAGCACCT  |
| SLC25A26 | TGGCTGGTGGGGTAGCAGGTGTTT   | AGCAGCAGAAGGAACGCCAGCA    |
| SLC25A27 | TACCGTGGCCGAGCTAGCAACCTT   | TCTTGCACCGTCTCCCAACCGA    |
| SLC25A28 | ACCCTGCGGAAGTGGTCAAGCA     | AAGGCCCCGGCCCCTTCATTTT    |
| SLC25A29 | CGTGCTTGTGGGACACCCGTTT     | TTGTACAGGCCCAGCACGCTCT    |
| SLC25A3  | AAATGCCGTATGCAGGTGGACCCC   | AGCACTGGCAGAGGCAGCCAAA    |
| SLC25A30 | CGGATGCAAGCGCAAAGCAACACC   | TGCGCAGTAAGGGACACACCCTTC  |
| SLC25A31 | TCCTCGCGAGCAGGGTTTCTTCA    | AGCAGCTCCACCAGAAGCCAGGTT  |
| SLC25A32 | TCGTGAAGATCCGCTTCGCCGT     | TGCAGAGGGTCATGGCTCCAGCTT  |
| SLC25A34 | AGCAACAGTGGCTCCCTGAGGACA   | AGCCAGTTTCCGAAGCTCGTCCCA  |
| SLC25A35 | AGAGCTGGAAGTTGGCGCTGGT     | TTGGGGACTCGGTTCTTGCCCTGT  |
| SLC25A36 | TTGATGCAAGGAACCGCGGGGA     | TGGCAGCAGCTAGCATCATTCCCA  |
| SLC25A37 | AACAGCCACCTAGCCAACGGGAT    | TTGCTGACCGGTGCTGCGAGTT    |
| SLC25A38 | AGTGCCTCATGACCAGGTGGATGC   | CGTCCACGCCATTGCTGCCATT    |
| SLC25A39 | TGCGGACAAAGCTGCAGGCTCA     | ACCAGTACAGGGCTGAGAAGGGCA  |
| SLC25A4  | CGGCATAAGCAGTTCTGGCGCT     | TCAGGCAGCATCCCCTTGGCAGTA  |
| SLC25A41 | AATACAAGGGTCCCCGCCCTTCCA   | AACCGCGTCTTCAGCACCTCCA    |

|          |                          |                          |
|----------|--------------------------|--------------------------|
| SLC25A42 | AAGGCCCGGTGCGATTGCATGA   | CCGGAAGGCCTCCTTGGCAGAAAA |
| SLC25A44 | AGGCTGATGGACTTCGCGGCTT   | TTCTTGCCCTCAACCTGCACACGG |
| SLC25A45 | TGCAGGCCTACTGTCTGGCTCCTT | TGGCTGAGCTGGGATTCTGGCCTT |
| SLC25A46 | CGGACGGATTTGATGGCTTGGGCT | TCTTCTCGCCCCAGTGCAGGTT   |
| SLC25A5  | GCAGTCAGGGCGCAAAGGAACTGA | AGCACAAAAGCACCACCCATGCC  |
| SLC25A9  | TTTTGGCCGGCTGCACCACA     | GCAAAGTTCCTTTCCACAGGCCCC |
| SLC26A1  | AACAGCAGCACCTCAACGGCT    | AGGACGTCTGGTAAAGCCCGGTCA |
| SLC26A10 | TGGGAAAACACAGCTGGCAGGC   | TGCCACTCCAGGTTGCAGCGAA   |
| SLC26A11 | TTTCGTCGCCGGCCTCTCAGTT   | TCCAGCAGGAACCCCAAACGCA   |
| SLC26A2  | CCAGTGCAGTCCAGCCAAAGCCAA | TTCTTGCCAGCCAGCAGGGAA    |
| SLC26A4  | TAGTGGCCACGCTGCAAGGGAT   | TCGGGGGCCATGCTCAGAACAA   |
| SLC26A5  | ACCGCAGCAGCTGTGCATGTCT   | TGCCAGTTCCCATTACGACCGCA  |
| SLC26A6  | TCATGCAGCTTCCGCAGGGCTT   | TGCCGGGAAGTGCCAAACAGGA   |
| SLC26A7  | AGCCAACGCCGTGGAACGGATT   | TGGCCACCTGAATCACACCTCCA  |
| SLC26A8  | CGCTGCTCATGGCACAGGTTCTTA | TGTCAGGCCTTGGGGAACTTGCAC |
| SLC26A9  | TGGCCAACAAGCACGGCTACGA   | AGGCTGGCCACCTGGGATTTTCT  |
| SLC27A2  | TGGACCGGCGCAGCAATCAAGT   | GCTGCTTGTAGTTCTGGCGACACC |
| SLC27A3  | TTGTCAACCAGCCCCCGAGCAA   | TAAAGCCAGGAAGCACGCCCA    |
| SLC27A4  | ACCGCAATGAGTTCGTGGGCCT   | ACAGATGGCTGAGGCCATTTGCT  |
| SLC27A5  | TGCGGCAATCGGGCGACGTTTA   | TACCCTCACAACTGGCACGCA    |
| SLC27A6  | TCGTTACGTGTGGTTCGGCCT    | CCAAGCAAATCTGCGCCACCA    |
| SLC29A3  | AAACTCCGCAACTCCTCCAGCCCA | ACGGATGTGGACTGCAACCCTGT  |
| SLC29A4  | CAGGATCACCGCAGGCTACCTCTT | AGCTTCGTGAGGATGCGGCTCA   |
| SLC2A10  | TTGGGCCAGTGACCTGGCTTGT   | AGAGGTTGGCCGCCAGTTGAA    |
| SLC2A11  | GCTCGTGGGAGTCAATGCAGGTGT | ATGAGGAGGTAGCGCGGGCTTTCA |
| SLC2A12  | GCGAGAGGCTGCGGCATGTTTA   | AGCTTCCGAGTCCAAGCAGGCA   |
| SLC2A13  | TGCTCAAGCGGCAGCTCAGTCT   | AAGCAATGCCGATGCCGAGTCC   |
| SLC2A14  | CCCTCTGAGGTGCTGCTCACGAAT | ATTGCGCCTGCCAAAGCGGT     |
| SLC2A4   | AGGGGCCTGCCAGAAAGAGTCTGA | AGCTGCAGCACGACCGCAATGA   |
| SLC2A5   | AAGGGAGGCTGACGCTTGTGCT   | TGCATGAGCAGTGCTGGGGAGT   |



|         |                           |                            |
|---------|---------------------------|----------------------------|
| SLC2A6  | TCGCCGCAGTGCTCGGCAATTT    | TCCCAGGGTGAACACGGACCCAAA   |
| SLC2A7  | ATGTTGACGACGCCAGAGCCCA    | ATGTTGACGACGCCAGAGCCCA     |
| SLC42A3 | TGCAGCATGGCCTGGAACACCA    | ACGTCCTGGAAGCTTGGGTAGCGA   |
| SLC43A1 | TGGTTGGCAGTGCCTGCTTAC     | AACGTGGAGCGCAGGTTCCCAA     |
| SLC43A2 | ATGCACAGCGTGTTCAGCCCCA    | AGAGGCCAACTGTCTTCTGGTCGC   |
| SLC43A3 | TGACATCCCTGCTGTGCCTGGGCTT | TTGCTCCCATAGAGGAAGGAGCGGC  |
| SLC44A1 | AGCACTGTGTGTAGCAGCGTGTCC  | AGGTGCACTCGCTGGAAGTGGT     |
| SLC44A3 | TAAAGCCATCAGCAGTGTCCCTTCC | AGTTCCCAGGCTCAGCAGCACA     |
| SLC44A4 | ACTGGCTGCCCATCATGACCTCCA  | TCAGGGCCGGAGCTGTCACTTCTT   |
| SLC44A5 | AAAGCTTGCCCTGGGGCTCTGT    | AATGCACCAGCAAGGGGCGCA      |
| SLC45A1 | ATGGGCTGCTGGGGCATGTGTAT   | CCGCACTGGACCCTGCAAACCTTCT  |
| SLC45A2 | AGGTTGCAAAGGGCATTCCCCCA   | TGCCCTGCGAGTCTGTTCAGCA     |
| SLC45A3 | ACCGGAAAGCCCAGCTCTTGCT    | CACTGGACCAATGCCCAGCACCAT   |
| SLC45A4 | AGCCGTGATGGCCATGTTTCCCA   | GGGGCTGTGGTGGATGTACTGCTT   |
| SLC46A1 | ACCCACCATGCAGGAAGTGGAGA   | AGGGCACAAAGGATGCGACCCA     |
| SLC46A2 | ATCTGCATGTGCTGCTGGGCT     | AAGCCGCCGAATAGCCCGTTCA     |
| SLC46A3 | TGCTCTTGCAACCAGCGTTTGGC   | AGGCAAAGCAAGCTCCCCAAAATGTG |
| SLC47A1 | AGTCACGCTGGCAATCGCGGTTAT  | TCACGCCACGTGCTTCAGGTT      |
| SLC47A2 | ACCCCGGGTTTGTCCATCCTCCAT  | GACACAGTTGCCACCACACCACT    |
| SLC4A1  | TGCGTTCCGTCACCCATGCCAA    | AGGATGGACAGGCCCAAGCACA     |
| SLC4A10 | AGCCGCTGCTGCCTACGAGAAA    | GACCACGATGCCTGTGACGTCGAT   |
| SLC4A2  | ACGAAGTCCAGAGCGAGCGGGTTA  | AGAAAGAATCTGCGCCCTTGGCGG   |
| SLC4A3  | CAAGTCCAAGGCTGCTGTGTTGCCT | TCATCTGTGGGCACCTGCTGCTCT   |
| SLC4A4  | ATACATCATGCAACCCACGGCCC   | AAAGGCTCCAGCGAGGACGCAT     |
| SLC4A5  | GGACGGTGCTGCTGGATTTGGACA  | TCCGGGCAGGACTGCGATTTGT     |
| SLC4A7  | AAGCAGCGCTGAAAGGCGAGGA    | TTCGCCCACCAGGACGTTGGAT     |
| SLC4A8  | AAGGCCAAGGAGGAAGAGGAGGCT  | GCACCACACGGCCCAAATCTTCCA   |
| SLC4A9  | AATGCATCCTTGCTGCCGCCAC    | TGAGCCCTTTGCGCACCCACAGA    |
| SLC5A10 | AATTCCTGAACCCAGCCCCACCGT  | TTCCAGCCACCACAACAGCACCA    |
| SLC5A11 | TGGGCAGGGTGTGTTGTGCTGCT   | ATGATGAAGACCACCGCCACAGGC   |

|          |                             |                            |
|----------|-----------------------------|----------------------------|
| SLC5A12  | TGAGCACCGTGGCTTCCAGCATP     | TGCTGAGGGAAGCCTGCACAACA    |
| SLC5A2   | TGGCGTTGGCTTGTGGTCCATGT     | TAGCAGCACACGAAGAGCGCA      |
| SLC5A3   | TCCGGCGCAGCAGTTTCTAGGT      | TGTACCAACCCCGCTGCATGGCTT   |
| SLC5A5   | AGTGGCACCTCAGCACAGCAT       | AGGCCGGCAGGAACATTCCCAA     |
| SLC5A6   | TGCCAGCCACAGTGAGCCCCTATT    | ACCCGGTCATGGCCCTGGTTTCTT   |
| SLC5A7   | ACCATGACAGCTACCTGGGTGCGA    | ACAGGAGTCCGCCCATGCGTTT     |
| SLC5A8   | TCTGCACCAGACCAGCTCATGCCT    | ACGCCAGCGCAGCCATTCCAATA    |
| SLC5A9   | TCGAGTGGAACGCAACCTGGCT      | CCTCTGGCCCCCAAATCGCTTCTT   |
| SLC6A1   | AGGCCCTGTGGCCAATGACAA       | AAGGCTCCCCACCATTTTCCCG     |
| SLC6A11  | TCGGCTGGGTGTATGGAAGCAACC    | ACAGGGCCATGAGCCAGCCAAT     |
| SLC6A12  | ACGGGAAGGTGGCAGTGCAAGA      | TGTTGGTCCATTGGCCCCGATCCT   |
| SLC6A13  | TGGCAGCAGCTTCACTAAGGTGGG    | TTGTTGTTCCAGTGCCCCCGCT     |
| SLC6A14  | GCCGAGGGAGTGAACCATGGACAA    | AAGGCGCCTCCACCATTGCTGT     |
| SLC6A15  | TGCCACCACCTATTACTGGTACAGGGA | TGACCCAGGCAGCCAACAAGCA     |
| SLC6A16  | GCCCTGAACCAGAAACCCACGCAT    | AGATGGCAGCGAAACTGCAGCC     |
| SLC6A17  | CACGCGTGACAGGTCCCTGAATGA    | TGCTCACTGCTGTGCTCACGCT     |
| SLC6A19  | TCTTCACGCCCAACGTCACGGA      | ACGGAGTAGACCACGATGGCCACA   |
| SLC6A2   | TGGATCACAGCCACGCTGCCTT      | TGCGGCATCAATCCATAACCGTGGC  |
| SLC6A20  | TCGCCAGCTACAATGAGCCATCCA    | AGGTGGCCTTGAAGCCATAGATGGAG |
| SLC6A5   | TGCATGGGGAGGCCTGATCACTCT    | TGCAATGCCTGGCCCTTGGTCT     |
| SLC6A6   | ACAAGCTGCGCCAAGAGGGGAGT     | TGGCCATCTCCTTGGTTTGGGAGC   |
| SLC6A7   | ACAGGCCATGACCATGCTGCCT      | ACCAGCCAGTACATGCCCCATCA    |
| SLC6A8   | TGGTGCTGGCCTGGGGCTTCTATT    | CCAGGCTGGCATTGGCACAGTCTT   |
| SLC2A8   | TCTTCATCGCCGGCTTTGCGGT      | TGCAGAAAGCGGAGGCAAGCCA     |
| SLC2A9   | TGAATGCCCCACCCCGTACATCA     | AGCAGGCCATCAGCAATGCAGC     |
| SLC30A1  | ATCACAGCGGCTTCAGCCAGGA      | TTTCTGGGTCTGCGGGGTCCAA     |
| SLC30A10 | TGTGTCCCCGGCGCTTTCGG        | ACAACCACGGACCCAGGGC        |
| SLC30A2  | GCTGCGCTGTGGCTGTGAACAT      | TGGGGTCCCTTCCATCAACACCA    |
| SLC30A3  | ATGCCCTTCCACCACTGCCACA      | AGAGTCTCTGAACGGTGCCAGCCA   |
| SLC30A4  | CGCCCCAGGATGGGGAGGGA        | GTGCGGAACGGCTTGGGGGA       |

|         |                               |                            |
|---------|-------------------------------|----------------------------|
| SLC30A5 | GCTCGTGAGCCCCGGGATGG          | TGTTAATCGAGCGCTGGGTACGTCCA |
| SLC30A6 | AGCAGCTGACCGAAGGTCCTGGAA      | ACTGTGCCAAGACTGTGGAGGCAA   |
| SLC30A7 | TGGCTGGACTGGCAGCTTCTGT        | TGTCCGTGGCCAGAGCCATGAGAA   |
| SLC30A8 | AGCCACAGAAAAGGGGGCGAA         | AATGTGCCACCCACGACCTCT      |
| SLC30A9 | TGGAAGTTTGGGGAAGCCCTGAAGC     | GCTGTTCTGGAGCGTGGCTTGGT    |
| SLC31A2 | AGTCCTGCTGGCATGGCCCTTT        | TGCTGGCTGATGGAGGTTGGCA     |
| SLC32A1 | ACCAACGCCATCCAGGGCATGT        | AGCACACAACGGCGGCGAAGAT     |
| SLC33A1 | ACACTGCAGGTCCCCAGCCA          | GCCAGTTTCCTCCCAGATTGGACAGC |
| SLC34A1 | TGTCCAGCGCTTTCAGATTGCCC       | AGCGGTACTTGGCCGTGCGTTT     |
| SLC34A2 | TTCACTCCAGATCGCCCTGTGCCA      | AGCGAGAGGCCAAACACCGTCA     |
| SLC34A3 | ACGTGGTGCTGTCCAACCCTGT        | ACACCCGGACAGTCAGCAGCTT     |
| SLC35A1 | TGGGGAGCCCCAAGGAACTGTTG       | AGGTCACCTGGTACACTGCTGCATCC |
| SLC35A2 | ACCGCTTCTTTGCCACCACTGC        | ACCAGGTGCTTCACGTTACCCCTC   |
| SLC35A3 | TCTTCAGGCACTTGGAGGCCTTGT      | AGTGGGATTTCTGCAGGTTTGGGA   |
| SLC35A4 | TCAACAGTGGAGTGGGCCAGGATG      | TGCCTCTTCCATGGCACCTAGAGC   |
| SLC35A5 | GGATAGTGCTGAAGAGGCGTCTAAACTGG | TGGCCCATGCCAAGACGGATGT     |
| SLC35B1 | CAGTGCCCTGGGTCAGAGCTTCAT      | ACACAAGCACAGTGCCACCCA      |
| SLC35B2 | TGCCACAGGGCTCCAGGTGTCTTA      | AGGCCAGCCACAATCAGTGCCA     |
| SLC35B3 | CCCTACCCAAGTCATCTTCAAGTGCTGC  | AGCACCACACCCGTCAGGTTGA     |
| SLC35B4 | TCACTCAGTACGTGTGCATCCGGG      | AAACAAGGTGCCAGCCAGTGC      |
| SLC35C1 | ACGCTGCTGTGCAAAGGCCTCA        | ACCAAGCCAGAAGCCCCCGATGAT   |
| SLC35C2 | TTGGCAGCTCATCTGCTGGGCGAT      | TTGGGGCCACCATCACCTCTGGAA   |
| SLC35D1 | GGCAGCCATGGCGGAAGTTCAT        | TGGCCACCATCTGGCCAAGTCCAA   |
| SLC35D2 | ACGACAGCAGTGGTTGGAGCCAT       | TCTCAAGCCCCCTGCCATGCAA     |
| SLC35D3 | CTGAGCCTGGCGCGCTCCTT          | CAGGTCGCCGGCTCCTGCC        |
| SLC35E1 | TGGTCAGCAGCGACTTGACCTACG      | TGGTGACTGGGTTGCGCAGCAT     |
| SLC35E2 | TTTTTGCCAAGAGCGACGGCGG        | AGCATCTGCACCGCACCTAGCA     |
| SLC35E4 | TCCGCGGACTCAAGTCGGTTCA        | AGACAGGAGGCAGCTGAGCAGGAT   |
| SLC35F1 | TCCGCAAAGTGCTGAACAGGGAGA      | TGGAAGACTGGTGTGTTGGCGTGG   |
| SLC35F2 | TGCTGGCATTTCGATCAGGCAGTG      | ACAGCCACGGCGATGAAGTGGA     |

|          |                             |                            |
|----------|-----------------------------|----------------------------|
| SLC35F3  | GGCAAGAGCATTGCCGTTGGCAT     | TCCACGGAGCGCGACCATTTC      |
| SLC35F4  | GCTGTGGCTGGCCTTCAACATCCT    | ATGGTAGCAGCCAGGCGGACAA     |
| SLC35F5  | AGGCCAGGGGTGCTGAGTTCTTCA    | AAGAGCCATTTCGCTGCGCTGA     |
| SLC36A1  | ACCTGCCCAACTGCTGGTTGTACC    | TGCGCACAAACAGGTCCACCACT    |
| SLC36A2  | CATGGTCTGCCTGACATGCCTCCT    | ACCACAAAGCCCACGAAGCCCA     |
| SLC36A3  | GAATGCCGGCTTGTTGGTCGGT      | TCAAGGCCGTACATCGTGGCCT     |
| SLC36A4  | GCAGCATGGGGGCGGAGTGT        | AGCCATGGAAACGTTGGCAAGGAATG |
| SLC37A1  | ACCATCGCCATGCTGCTGCTCA      | CGTGCGCGTTGCCTTTCAGACT     |
| SLC37A2  | TCGTCAAGAGCCGTCTGCACCA      | AGCGGAAGCCGCTCCCCAAAAA     |
| SLC37A3  | TGGTGACGGCGTCTGTGCAGT       | GGCGTAGGCCAGTGAGTACGGT     |
| SLC37A4  | TCATGGCCAATGTGGGCGGCTT      | CGTGCTGGCCGCACAAATCACT     |
| SLC38A1  | TGTGATCCTCACAGTGCCGGTGT     | GCCCAAGAAAAGGGCAGCCCAA     |
| SLC38A10 | AGAAGCCGAAGCTGCCGAAGGA      | AGGCACAGCAATCCCTTGCCCA     |
| SLC38A11 | AGCAAAGCTTGAAAGGTCTCCCTCA   | ACCCCGACCGCTTGAATGGCA      |
| SLC38A3  | TGATGCGGCAGCTTGGCTACCT      | TGGGCAGGGCACGTGGAACCTT     |
| SLC38A4  | AACTCCCGGACGGCCTATGCAA      | ACAAGGACTGCCAGGCGAACCA     |
| SLC38A6  | TGCTGACAGTTGCTCTCCTGGCT     | TGCCTGCCACCACCAACTTTCCA    |
| SLC38A7  | TGGGCTGTGTGTGGCAAGCTGA      | ACGACGCTCAGGAAGCTGGCAT     |
| SLC38A8  | AGCATGCGCAAACGGAGCCTCT      | AGTCCTGCATCACTGACCTCCCA    |
| SLC38A9  | TTCGGCTCCTTTGGGCAGTGGT      | CCGGCACTTGGACAAATCACAGGG   |
| SLC39A1  | ACGTGACGCTCCAGTTCCCACT      | ATGCTGCGGCCACCATTCACT      |
| SLC39A10 | TGCTGCACATAACCACCACGGC      | AGCTGCACCAATTGCGAGCCCA     |
| SLC39A11 | ACACAACGTTCCAGAGGGTCTCGC    | AGCACCACGGCAAAGGCACCAA     |
| SLC39A12 | CCTGGGATCAGACCTGCTTCTCTGC   | GACCAGCGCTGTCCCCAGCA       |
| SLC39A13 | TGCCGTGGTCCGGAGCATCAA       | AGGATGGCAAAGTCGCCACCTCA    |
| SLC39A14 | GACACAGGAACCTCTCCACGTGCT    | CGTTTTCTGGTTCTCCGAGGTGC    |
| SLC39A2  | GGTTCAGATTGATGCAGCCAGAGGTCA | GCACTGCAATGCCAGCGACTCC     |
| SLC39A3  | CCGGGAGTTGCTGGACTGAGACAT    | AACACGCCCAACATGCACAGGA     |
| SLC39A4  | TGAGCTGGCTGCTGCAGAGGAT      | ATCAAGGCTGACAGCTCGGCCA     |
| SLC39A5  | TACCGCATGCACAAGAAGGGCG      | TGCCGCAAAAGCCCCAGCAT       |

|                |                                    |                                    |
|----------------|------------------------------------|------------------------------------|
| SLC39A6        | AGCGATGGCCTAGCAATTGGTGC            | CCTGCTTAACGGTCATGCCAGCCT           |
| SLC39A7        | AAAGCAGGCGATGCGTCTGCAACT           | AGCAGCTCGGGCAACACAGACA             |
| SLC39A8        | CCCATGTGAGGATCGGCCAAGC             | TCGACTTTGGGATCAAATCCAAATGC<br>CTCT |
| SLC39A9        | AGCACAGCCACGACCACACACA             | ACACCATCAGCTGCAGCATGGACA           |
| SLC40A1        | CGGATGTGGCACTTTGCGGTGT             | ACCAGCGAGGTCTGGGCCACTTTA           |
| SLC41A1        | TGGACATCGTGCAGCACTGGGA             | AGCCAAAGACGACGGCTGCGAT             |
| SLC41A2        | GGCGCTGTGTTACAGGTATTTACCTTGCT<br>G | GCTGTCCCAGCAGATCACCCA              |
| SLC41A3        | TCATCCAGGTGCAGGCCACTGT             | GCTGCAATGGGCGTGGCAATGT             |
| SLC48A1        | ATCACCCGGCATCAGAGCCTCACA           | TCACCCCCTGGGTCAGAAATCGCT           |
| SLC22A2 splice | TGGTTGCAGGGGCAGCCTGT               | TGGGCCGTGACACTCCCTTTCTCC           |
| ABCC7          | TGTCACTGGCCCCTCAGGCAA              | CCAAAGAAGCAGCCACCTCTGCCA           |
| ATP1A1         | TGTTGAAGGCACCGCACGTGGTA            | CCGTGACAGTGGCCAGCAAACCTT           |
| SLC42A1        | TGCTGTGGGCACTTGTGCGGAT             | CATAGACGTGTTGGAGGCGCCCAT           |
| SLC42A2        | ATGCACCAGCTCTTCGGGCTGT             | CAGGCACCTGCCAGTGAACCTGGT           |
| SLC6A9         | CCCCAGAACAGAATGGTGCTGTGCC          | ATGAAGGCGCCTCCCCGTT                |
| SLC7A10        | TCCAATGCGGTGGCTGTGACCT             | TACGTGTGCGCCACGAGCATGA             |
| SLC7A13        | TGTCTGGCATTGGCCATGTTGTGG           | TGGGCTTCTTCAGCTCCCCTGCTA           |
| SLC7A14        | ACCCTCAATGGCCTGGGGAAAGGT           | AACTGGCCCTCCGCCAGTATTT             |
| SLC7A2         | AGCAAGTGCCAGAGAGCCACCT             | TTGCAGCACCAGCCAACGTTCC             |
| SLC7A3         | GGGCCTGGAGCTCTGCTTTTGACA           | AGCCCCGAGAGCCAACAATCCAGT           |
| SLC7A4         | TGCCATTGCAGCTGGTGCCTACA            | AGGACGGTGTTTCATGGCGCAGA            |
| SLC8A1         | ACTGGAATGGCTGGGCGTGTTTCA           | TGCTGGCAAATGTGTCTGGCACTG           |
| SLC8A2         | TGGAGTTTGGCGACGACGAGACCA           | AGCTTCCTGTCCCCATCCCCTTGA           |
| SLC8A3         | ATTGGCAACGTGACGGGCAGCA             | GCCTTCGGTACAAGAGCACGCTGA           |
| SLC9A1         | TTGTGCAGGGCATGACCATTTCGGC          | TGTCCTTCCAGTGGTGGTGACCGT           |
| SLC9A10        | ACCAAGTCTGCAGCCTCTGCCCT            | ACGCCTGTTGGCCAGCTCCA               |
| SLC9A2         | TGGGTGTGTCTACCGTGGGCAA             | ACAAAACACCCAGGGCTCGCCAC            |
| SLC9A3         | ACAAGCCGCGGCAGGAGTACAA             | TTTCTCCGCTTCTGGGCACGCT             |

|          |                          |                           |
|----------|--------------------------|---------------------------|
| SLC9A3R2 | TCCCTTCCAGGAGAGCGGCCT    | AAGGTCCGTGCGGGAGGGGT      |
| SLC9A4   | GGAAAGCCGGCTGGCACCAAGAAT | ATCCGAGAGCATGCGCTGAACGTG  |
| SLC9A5   | ACAAGCCGCGCCGTAGGTACAA   | AGCCGCCGCTTCATGTTCTGCT    |
| SLC9A6   | TGTTTGCTGGCCTTCGTGGTGC   | TGCCACCACCAAATACCCACACGG  |
| SLC9A7   | AGTCTTACAAGGGGACGGCCCAGA | TCAGGTCGCCTTCGGTCAGGATGA  |
| SLC9A8   | ACGCAGGAGGACCTGCACCAC    | TCCTGGGCCTGCCTGCCTGA      |
| SLC9A9   | TGCAATGGGGTCTGCGTATGCCA  | AACTATCCCTGTTAGGCCGGCAGC  |
| SLCO1C1  | AGGGCCAACTTTGTGATCGGGCT  | TCACAGCCCAGTGCAAACAGGGA   |
| SLCO4C1  | CTTGGCCGTCACGCAAGGTATTGT | GCTGCAAATGCAAGCCATCTCGGC  |
| SLCO5A1  | TTGAAGCAAGGCCCGAACCCGT   | TGCACACCAGGAAGCAACGGGAA   |
| SLCO6A1  | TGCCAGACCCGGGAAATGTGATGC | TGTCAGGTACAACCCGCGTCATGG  |
| NR0B2    | TGCGGTGCAGTGGCTTCAATGCT  | CTGGCACATCGGGGTTGAAGAGGA  |
| ABCA1    | GGTGATGTTTCTGACCAATGTGA  | TGTCCTCATACCAGTTGAGAGAC   |
| ABCA12   | GGTCACGTTGATTCTCACAGC    | GTTCTTCCACAGTTACCAGGTCATC |
| ABCA13   | GACCCACAACCTTCGGCATTG    | AAGGTCCCAGTGTAGCAGAAC     |
| ABCA2    | CGTGAACCTTGCCAAGAAG      | CTGAGCAAGCAGCCGAGAG       |
| ABCA3    | GCTGACTGTGATTAGGTGCTG    | AGAGACTGCTTCGAGCCTG       |
| ABCA4    | CACTAGCAGCTTTGGCCTC      | AATCACACACAACGCAGACAC     |
| ABCA9    | GGCATAAGCCTAAGCCATAC     | TAAGCATTCTCCATGACATCCTC   |
| ABCB1    | ATTGTTTGCCACCACGATAGC    | ATAAAGTCATAGGCATTGGCTTC   |
| ABCB11   | GAAACAACGCATTGCTATTGC    | TTCCTTTCTGTGTCTAAGGCAG    |
| ABCB4    | AAGAAGCAAAGAACTCAATGTC   | GGTAACGTCTCGATGAAAGGATG   |
| ABCB5    | AAGCCAGGACGGGAAGGAC      | TCCATTGTGCAGAACCACTATC    |
| ABCB6    | GAGGCTCTGTTGTCCCGAG      | ATGGTCTGAGGCTTAGTGTCTTC   |
| ABCC1    | TAGAGACTGAGAGTGAGCAACCAG | AATCAACACTGTAAGCAACCAACAC |
| ABCC10   | GCCGGGCCTATACAGAGGTG     | AGATGCAAGAGGGCCAGAGC      |
| ABCC11   | TTGCTGGATGGAAACCCTG      | GATCACTGAATCCCATGTCTTAG   |
| ABCC12   | ATGAAGCCACCGCCTCTATG     | AGGACGTGATCGCAGTTGAG      |
| ABCC2    | GGAGAAACAGTGAACCTGATG    | CCAACACCTGCTAAGACTGAG     |
| ABCC3    | AAGTGGTGAATGACACGCCTAAG  | CAAATAACACTCAGTTGGGAATC   |

|         |                           |                           |
|---------|---------------------------|---------------------------|
| ABCC4   | CTATTATGGTTTGAAGTGGAGTCTC | TATATGCAATTTTCAGGGAGGTGAC |
| ABCC5   | GTGGCAAGAAGAGCTGAATG      | ATCAGGCACACGATGGACAG      |
| ABCC6   | TGTCAACAGCGACTCTCAG       | GATTTAAGGGTCTAGCCGGGAG    |
| ABCC8   | CTTCGTGAATCTGCTGTCCAAAG   | GCCGTTGGTAGTTGGTGAG       |
| ABCD1   | AATACCACACACACTTGCTACAG   | GCTGCTTCTCCTCCGTCAG       |
| ABCD3   | TTACTACCAAAGTGGAAGAATGC   | ATCTAGTCATTTACGCCCAG      |
| ABCD4   | TACGGCTAGATGCTGTTGC       | AGTCCGTCTAACTCCTCACCTC    |
| ABCF1   | CCATTATCCAGCCCAAGATTTG    | CAAGTCCTCAACCAGACAAGAG    |
| ABCG1   | ATCTGCACTGTGACATCGACG     | AATAGGCAATGAGGCGGAG       |
| ABCG2   | CATGGTGTATAGACGCCCTG      | ATGCCATGTTCCCAAATTG       |
| ABCG4   | TTGAGGGTGTGATCCTGAC       | CAGCACAAGGTAGGCCAGC       |
| ABCG5   | CCTGAGGTTGCCGATTTG        | AATGGACAGCAGAGCCACTAC     |
| ABCG8   | AGCTGGACTCGTACCCTCTC      | GTCTTGACTTGGTTTCTGTTTG    |
| ACTB    | GCGGGAAATCGTGC GTGAC      | AGGAAGGAAGGCTGGAAGAGTG    |
| AHR     | AATCACGTTAAACCAAATACACG   | AATAAATCCCACAATGTAGCAGTG  |
| ARNT    | TCTTGATTGCGGCTTTATC       | AACCCTATGATTTCTGATTCCTG   |
| ATP7A   | ATGTTGGAATAGATGATACCTCAAG | TCCCACCAGGAGTGAGTGC       |
| ATP7B   | TCACCTTGGATGGTTAGTTTC     | AGGACACAATTACTGACGGAC     |
| B2M     | CAGCGTACTCCAAAGATTCAGG    | AATGTCGGATGGATGAAACCC     |
| CYP1A1  | GCACATATCCAGGCACCAG       | TGTAGAGAAGGGAGACCAATAGAAG |
| CYP1A2  | AAGCCCTTGAGTGAGAAGATG     | CTTCATGGTCAGCCCGTAG       |
| CYP2B6  | TCTTCACGGTACACCTGGGAC     | ATATCCCCGGAAGAATGGGTC     |
| CYP2C19 | GGAGCTGTTTTTATTCTGACC     | CAGACAGGAATGAAGCACAGC     |
| CYP2C8  | CTGGCTGCCGATCTGCTATC      | CCTTAATGGAGTTTGGATGC      |
| CYP2C9  | TTCTCTTGTGGTCCTTGTGC      | GGATTTGCTGATGTCCTTAATAC   |
| CYP2D6  | GAACGACACTCATCACC AAC     | GCTTCACAAAGTGGCCCTG       |
| CYP2E1  | TTCCCAGCTTTCTACACTACTTG   | ATTTCCACGAGCAGGCAGTC      |
| CYP3A4  | CCTTTCATATTTCTGGGAGACAG   | ATTAAGTGTTTCATTGCATCGAG   |
| CYP3A5  | AATTAGACACGCAAGGACTTCTTC  | CTCATTCTCCACTTAGGGTTCCATC |
| GAPDH   | TCAACGGATTTGGTCGTATTGG    | GTTCTCAGCCTTGACGGTG       |

|         |                            |                           |
|---------|----------------------------|---------------------------|
| GSTP1   | GCTTTGAGTGAGCCCTCCT        | CGCCCTACACCGTGGTCTA       |
| GSTT1   | GCCAAGGACTTCCCACCTG        | AATGCTTTGTGGACTGCTGAG     |
| HNF1A   | AGGCAGGGAGAATGCGACT        | CATTGCCCATCGTCAACACCT     |
| HNF4A   | AGATCAAGCGGCTGCGTTC        | GGCCACGCGAGTCATACTG       |
| NAT1    | TTCAACACCAGATCCGAGCTG      | AATGGCCTCTAAGCCTAAGTC     |
| NAT2    | TCACTGAGGAAGAGGTTGAAG      | GTGAGTTGGGTGATACATACACAAG |
| NFE2    | GTCTGAATGCTCCAAGTGAG       | GGCAGTAAGTTGTGGGTGGTG     |
| NR1H2   | ATCGTGGACTTCGCTAAGC        | TAGTGGATGCCTTCAGGAG       |
| NR1H3   | ACAGATCCGCCTGAAGAAAC       | TTACACTGTTGCTGGGCAG       |
| NR1I2   | GGAGGTGAGACCCAAAGAAAG      | CATTGAAGTGATAGCCAGTGG     |
| NR1I3   | TTCCCTGCCATTGAAGAC         | AGAAAGTGGTATTGAGTACGATGTG |
| NR3C1   | AACTGAGGCACTTAGGACATAAC    | TGAAGGGAGCGTGGCTTTC       |
| NR5A2   | AGGTGTCCAGGAACAAGTCAATG    | CGGATTTCCGGTAGTCGAAG      |
| PGR     | TGGGAGATGGTAACACCTCTG      | GCACACTCTATAAGCTGGAGC     |
| PPARA   | GAACGATTTCGACTCAAGCTG      | GACATCCCGACAGAAAGGCAC     |
| PPARD   | AACGGCAGTGGCTTTGTAC        | CTCCACACAGAATGATGGCC      |
| PPARG   | ACAGATTGTCACGGAACACG       | GGAAGAAGGGAAATGTTGGCAG    |
| RARA    | ACTGTCTGCCTCCCTTCTGA       | AGTCCACCCAGCATAGGGG       |
| RARB    | GTA ACTCTAGTGTCCTTCCTGATTC | TTAACCACTCTACCACAGCTTTC   |
| RXRA    | GCCTTCCTGTGACTGACTGTG      | TTAACGAACTGAATGGCGATG     |
| SLC10A1 | ATTGTGATGACCACCTGCTC       | GTGGCCGTTTGGATTTGAG       |
| SLC10A2 | TAAAGGGACCTGAGA ACTCCTC    | CAAGTCACAAGTTACCGCATC     |
| SLC15A1 | GGCCGAGTACATTCTATTTGC      | GATCTCCGCTGGGTTGATG       |
| SLC15A2 | TGGAATGAAAGCTGTGCTGAT      | ATAACAGAGGCTGCTGAAGGC     |
| SLC16A1 | ATGGCAGATAGAGGAAGAGTGTTAG  | GAGAGAAGAAGTACGCAGAGGTTAC |
| SLC16A2 | GCCTTCTACTTTGCCGGTGTG      | GATTGGTTCCTCAGGGTTG       |
| SLC16A3 | GAGACAACGTGACTTTAATGGGAG   | CATGTGAGCCCAGGGTAGGAC     |
| SLC16A4 | TTTGTGCAGGTCCCCTGGTTGCT    | TCAGTCCCATCCCAGAACGGGCAA  |
| SLC16A5 | GCCCGTGCAGCGGTACAAAGAAA    | TGCCAATGTGGCTGCTGCCTGT    |
| SLC16A6 | TTTTCAGCTCCCCTCGCCACAGT    | GCTGGTGCGAAAGCAAACACAGCG  |



|          |                             |                           |
|----------|-----------------------------|---------------------------|
| SLC16A7  | TGGCCCTCCTCTTGCAGGTAAATTGGT | TGCCAATGAGCAGCCACACGCT    |
| SLC16A8  | AGAAGGAGACTTGGGAGGCAGCGA    | GCGGAAGAAGACGCTCACGGCTTT  |
| SLC18A1  | GGCATAGTCCCAACAGATCG        | CGGGAAAGAACACGTTGAG       |
| SLC18A2  | TGAAGAATCTGAAAGTGACTGAG     | TATAAGGCTGTTGGCAATCG      |
| SLC19A1  | GTGCTGGCCTTGGTATGTG         | GCGCTCCTTAGACCCTGAG       |
| SLC19A2  | TCGACATACTCATTTGGTTTAAGC    | TCCCTTCCCTTCCTTAGC        |
| SLC19A3  | TAATCTGAATGTGGAACGCTATG     | AATGCTGACTGGCAAGTTGAG     |
| SLC1A2   | AACTGGGCTTTATGCAGGATTC      | GATGCTCTGTGCTACGTGACTTC   |
| SLC1A3   | AGCCCATCATCTCGCCAAG         | ACATCTACAAAGTAATGCTTCCCAG |
| SLC1A4   | ACGGTGGTGAATGTGGAAG         | CACCTCAGCAAGTTCCTGC       |
| SLC20A1  | CTCTGCGTTGTTGGTTTCAC        | CCTCATCCCTCTAAGAAGCTC     |
| SLC22A1  | TTCACGGACTCTGTGCTCTATC      | TCAATGGTGATGAGGGCTATG     |
| SLC22A12 | GCCTTTGGCTTCACCTTCTTC       | GTCCACGACACCAATGAAC       |
| SLC22A18 | GTACAACCACTGCTCCGAAC        | ACAAGGGTATTGATAGCAACCTG   |
| SLC22A2  | AGCCCATACAACCAACCAAC        | ATGCTGAGAATAAAGTGAGCTG    |
| SLC22A3  | GCGCAGTGGTGTATCAAGGAC       | CAAGGCGCTCAATGGTTAG       |
| SLC22A4  | GGTGATGGTGGGCAAGTTTG        | CAAGGTAAACGAAGTAGGGAGAC   |
| SLC22A6  | ATTGTCCGAACCTCTCTTGC        | CGGATCATTGTGGGATACAG      |
| SLC22A7  | CCACCTCCAGAGTCCAAGG         | CAAAGCCCATGCTGCTCAC       |
| SLC22A8  | CAAACAGGTATGGGCGTAAG        | ATAGTCTCTGGCAAGGGCTG      |
| SLC22A9  | CCTGCCCTGGATCATCTATG        | AGAGGCTTGTTCTCTGGTTTC     |
| SLC23A2  | CCGGAAATGGAAGAAGGGTG        | GTGTAGCCCACAAAGGTTG       |
| SLC25A13 | TGCGGGACATTCTTTCTC          | GGCTTCCTGGGCTAACCTG       |
| SLC25A6  | TTGTAGGAGCCAAGTCGTG         | ACCTCTGCGTCCTCTGTTTATTG   |
| SLC26A3  | GACCAGCCAATCAATACCACAGAC    | CACTGAAGAAACATCAAGAAAGGAC |
| SLC27A1  | CAAGATCCAGAAGACGAGGCTG      | GCAGATGCGAGTGTAGACTG      |
| SLC28A1  | TGAAGTGACAAGGCAAGCCAG       | CTCAGAGAGAGAGGGAAGCAC     |
| SLC28A2  | ATGGCACCAACCCTCCTTC         | AGGCACAGACGGTATTGTTGTAG   |
| SLC28A3  | CAGCACTCCTGTGGACATC         | CTGCTCAACAGACTTTGGCAAC    |
| SLC29A1  | GTGGCTAGGAGCTGGGTCTG        | AAGGCAGTAACGTGGCAAC       |

|          |                            |                           |
|----------|----------------------------|---------------------------|
| SLC29A2  | AGCTCTTCCATACCCACTCTCTCAC  | GGCTCTACCACGGACCAGTC      |
| SLC2A1   | CTACTCCATTA ACTCCACCCACCTC | ACACAGGGCAGCTTGACAG       |
| SLC2A2   | GTCTAATCTTCTCAGCGGCAG      | GCTCCCATTTTCTTTCCTAGTGG   |
| SLC2A3   | CGGCTTCCTCATTACCTTCTTG     | GACATTGGTGGTGGTCTCCTTAG   |
| SLC31A1  | CAACAGATGCTGAGCTTTCCTC     | ATCCACTACCACTGCCTTCTTC    |
| SLC38A2  | GAAGAAGGCCGAAATGGGAC       | GGTAGGAGTAGTTGAAGTCGCTG   |
| SLC38A5  | TTGCGCTTCTGTGTCGTCCTAC     | TGCAATACCAGCACAGGTCAG     |
| SLC44A2  | CGGTGATCGTTGGCTCCTAC       | AGAAGCAGAGGAACAGCGTG      |
| SLC4A11  | ATTGTGAACGTGAAGGAGACG      | GGAGGTGAGCGCGATGTAG       |
| SLC5A1   | AGGAATCTTCAGGAGAGCCTATG    | AAGACAGCCACGGTCACCAG      |
| SLC5A4   | ACGTGGATGCCTCAAGAAAGC      | TGAATAAAGACCACCACAGCCAG   |
| SLC6A3   | AACCCAGGTGTTGTCCGTG        | TTATTGTGCTTAGGGACCCAC     |
| SLC6A4   | AGGTTTAGAATCAAGTCTGTGAAAG  | CTAGCGAGATAGCATCCCTG      |
| SLC6A18  | TCTGCGATGACATTGCGTG        | TCAGTGGCTTCCAGAACAG       |
| SLC7A1   | CATCACGTTATGACTCCTAATG     | GAAGCACTGGCACAGAAAG       |
| SLC7A5   | ACCCTCTGCCGAGTAATGACG      | AAGCCAGAACACCCTACCCAAC    |
| SLC7A6   | GGTGGGTGCTGTGAAGAGTAAAC    | AACAGGGAGCGGTAGTGAAATAG   |
| SLC7A7   | TTCTTCCCGATTGTCTTCTGC      | GGTCGCTTATGTTCTGGCAC      |
| SLC7A8   | GCCAGAAGATGTGTGTGGTCG      | GCTGCTGCTCCTCCATGTC       |
| SLC7A9   | CCGATTACCATGCACCTTCAG      | TTGGCTACAAGAGACGGAG       |
| SLC7A11  | CCATTGTCACCATTGGCTATG      | GCATTTGAAAGCAGCAGCTC      |
| SLC9A11  | AGCATGAGGGTTCGTGATGTTG     | CAATAATGCCTCTTGAACAAAG    |
| SLC9A3R1 | AGGTGAATGTGTTCCCGTC        | GCCTGGTCCCATGATCCTG       |
| SLCO1A2  | AGTTCTTGGGCTGTGCGAC        | TGAAACTGCTCATCGCTGAC      |
| SLCO1B1  | GTA ACTGGTCTCCAGAACAGA     | ATGTGAGGTGCCTCCAAGTG      |
| SLCO1B3  | GGTGTTCCTGGTCTTTCCTG       | TCACACACTAACCATGCCTC      |
| SLCO2A1  | TGCCCTGCAACTAACCCCTG       | TGGCATTTCATTGTTTCATAAACTC |
| SLCO2B1  | AGGTTCTGTGATCTGCTTCG       | AGGGCTGGATCTGCTCTCTTTG    |
| SLCO3A1  | CCTGCGTCCTCTACGACAATG      | GAGGCAAAGAACTCACTGGTG     |
| SLCO4A1  | GACAGTGCCACAGATAGCCAG      | CAGGTAAAGTAGAAGGTTGCAGGTC |

|         |                       |                           |
|---------|-----------------------|---------------------------|
| SULT1A1 | GAATTTGAGGCTACCCAGTGC | GGTCCTGGACAGTCACCTCTC     |
| UGT1A1  | GAATTTGAGGCTACCCAGTGC | GGTCCTGGACAGTCACCTCTC     |
| UGT2B7  | GTCATGCGCCACAAAGGAG   | TAAATATCACAGTTGCCACACAG   |
| VDR     | AATCCTCTGGCTGGCTAACTG | TTCTCTTTGGAAATCATTTCAGCAG |

**Supplemental Table S3.** Differentially expressed genes in the human eye

| <b>Gene Symbol</b> | <b>Log2 Fold Change in Gene Expression</b> | <b>Empirical Bayes Moderated T Statistic</b> | <b>Empirical Bayes P Value</b> | <b>False Discovery Rate-adjusted P Value</b> | <b>Log-Odds of Differential Expression</b> |
|--------------------|--------------------------------------------|----------------------------------------------|--------------------------------|----------------------------------------------|--------------------------------------------|
| ABCG2              | 4.02                                       | 5.51                                         | 0.0001                         | 0.02                                         | 1.36                                       |
| ABCC4              | 3.93                                       | 5.50                                         | 0.0001                         | 0.02                                         | 1.35                                       |
| SLC10A2            | 3.40                                       | 5.19                                         | 0.0002                         | 0.02                                         | 0.90                                       |
| SLC7A8             | 4.56                                       | 5.16                                         | 0.0002                         | 0.02                                         | 0.86                                       |
| SLC28A3            | 3.25                                       | 5.15                                         | 0.0002                         | 0.02                                         | 0.84                                       |
| SLC22A15           | -4.54                                      | -4.81                                        | 0.0004                         | 0.02                                         | 0.32                                       |
| SLC12A6            | 5.68                                       | 4.80                                         | 0.0004                         | 0.02                                         | 0.31                                       |
| SLC7A2             | 3.97                                       | 4.50                                         | 0.0007                         | 0.03                                         | -0.15                                      |
| HNF1A              | 3.74                                       | 4.49                                         | 0.0007                         | 0.03                                         | -0.18                                      |
| NAT2               | 3.22                                       | 4.48                                         | 0.0007                         | 0.03                                         | -0.18                                      |
| SLC11A2            | 3.84                                       | 4.46                                         | 0.0007                         | 0.03                                         | -0.21                                      |
| SLC39A13           | 3.74                                       | 4.36                                         | 0.0009                         | 0.03                                         | -0.37                                      |
| SLC10A7            | 3.36                                       | 4.24                                         | 0.0011                         | 0.04                                         | -0.57                                      |
| CYP2E1             | 2.79                                       | 4.18                                         | 0.0012                         | 0.04                                         | -0.68                                      |
| SLC35F5            | 4.32                                       | 4.13                                         | 0.0013                         | 0.04                                         | -0.76                                      |
| HNF4A              | 2.73                                       | 4.12                                         | 0.0013                         | 0.04                                         | -0.76                                      |
| ABCA4              | 4.59                                       | 3.98                                         | 0.0018                         | 0.04                                         | -1.00                                      |
| SLC19A2            | 2.72                                       | 3.94                                         | 0.0019                         | 0.04                                         | -1.07                                      |
| SLC17A3            | 2.92                                       | 3.90                                         | 0.0020                         | 0.04                                         | -1.13                                      |
| SLC2A14            | 3.69                                       | 3.81                                         | 0.0024                         | 0.05                                         | -1.28                                      |
| ABCA2              | 2.67                                       | 3.72                                         | 0.0028                         | 0.06                                         | -1.43                                      |
| NR1H3              | 5.04                                       | 3.71                                         | 0.0029                         | 0.06                                         | -1.45                                      |
| RXRA               | 2.92                                       | 3.63                                         | 0.0033                         | 0.06                                         | -1.59                                      |
| SLC20A1            | 3.65                                       | 3.54                                         | 0.0040                         | 0.07                                         | -1.74                                      |
| SLC13A4            | 2.20                                       | 3.41                                         | 0.0050                         | 0.08                                         | -1.95                                      |
| SLC16A12           | 2.38                                       | 3.37                                         | 0.0054                         | 0.09                                         | -2.02                                      |
| SLC10A6            | 2.21                                       | 3.29                                         | 0.0063                         | 0.10                                         | -2.16                                      |
| SLC16A9            | 2.78                                       | 3.26                                         | 0.0066                         | 0.10                                         | -2.21                                      |
| SLC27A4            | 2.52                                       | 3.12                                         | 0.0087                         | 0.12                                         | -2.45                                      |
| SLC22A10           | 2.37                                       | 3.09                                         | 0.0092                         | 0.12                                         | -2.50                                      |
| NR0B2              | -3.48                                      | -3.09                                        | 0.0092                         | 0.12                                         | -2.50                                      |
| ABCA13             | 3.26                                       | 3.07                                         | 0.0094                         | 0.12                                         | -2.53                                      |
| SLC30A1            | 1.84                                       | 3.00                                         | 0.0109                         | 0.14                                         | -2.66                                      |
| SLC2A6             | 2.52                                       | 2.89                                         | 0.0133                         | 0.16                                         | -2.84                                      |
| SLC25A42           | 1.92                                       | 2.87                                         | 0.0137                         | 0.16                                         | -2.87                                      |

|          |       |       |        |      |       |
|----------|-------|-------|--------|------|-------|
| SLC39A10 | 2.47  | 2.77  | 0.0166 | 0.19 | -3.04 |
| SLC26A5  | 2.41  | 2.77  | 0.0168 | 0.19 | -3.05 |
| SLC39A3  | 2.75  | 2.74  | 0.0176 | 0.19 | -3.09 |
| SLC35A4  | 1.67  | 2.72  | 0.0181 | 0.20 | -3.12 |
| AHR      | 2.40  | 2.68  | 0.0198 | 0.21 | -3.20 |
| SLC38A11 | -1.75 | -2.65 | 0.0207 | 0.21 | -3.24 |
| SLC35B3  | 1.94  | 2.65  | 0.0207 | 0.21 | -3.24 |
| ABCC8    | 2.51  | 2.64  | 0.0212 | 0.21 | -3.26 |
| SLC26A7  | 2.66  | 2.63  | 0.0217 | 0.21 | -3.28 |
| SLC27A2  | 2.69  | 2.62  | 0.0220 | 0.21 | -3.29 |
| SLC35D1  | 1.69  | 2.60  | 0.0229 | 0.21 | -3.33 |
| ABCA9    | 2.67  | 2.54  | 0.0256 | 0.22 | -3.43 |
| SLC25A38 | 2.00  | 2.53  | 0.0258 | 0.22 | -3.43 |
| NFE2     | 1.92  | 2.52  | 0.0264 | 0.22 | -3.46 |
| SLC22A16 | 3.10  | 2.52  | 0.0265 | 0.22 | -3.46 |
| SLC26A9  | 1.80  | 2.51  | 0.0271 | 0.22 | -3.48 |
| SLC4A11  | 1.64  | 2.49  | 0.0280 | 0.22 | -3.51 |
| SLC18A1  | 2.00  | 2.48  | 0.0287 | 0.22 | -3.53 |
| ABCD2    | 2.04  | 2.46  | 0.0297 | 0.22 | -3.56 |
| CYP2C19  | 2.11  | 2.45  | 0.0301 | 0.22 | -3.57 |
| SLC11A1  | 1.87  | 2.44  | 0.0306 | 0.22 | -3.59 |
| SLC25A35 | -1.82 | -2.43 | 0.0313 | 0.22 | -3.61 |
| SLC2A3   | 2.34  | 2.43  | 0.0315 | 0.22 | -3.61 |
| SLC1A5   | 2.34  | 2.41  | 0.0323 | 0.22 | -3.63 |
| SLC24A2  | 1.87  | 2.40  | 0.0329 | 0.22 | -3.65 |
| ABCA3    | 2.20  | 2.40  | 0.0330 | 0.22 | -3.65 |
| SLC6A19  | 1.97  | 2.40  | 0.0331 | 0.22 | -3.65 |
| ABCF3    | 1.87  | 2.40  | 0.0331 | 0.22 | -3.65 |
| SLC2A5   | 2.59  | 2.39  | 0.0335 | 0.22 | -3.66 |
| SLC25A31 | 1.76  | 2.38  | 0.0344 | 0.22 | -3.69 |
| SLC46A3  | 2.10  | 2.37  | 0.0347 | 0.22 | -3.70 |
| SLC41A1  | 1.73  | 2.37  | 0.0350 | 0.22 | -3.70 |
| SLC12A8  | 3.31  | 2.35  | 0.0362 | 0.22 | -3.73 |
| CYP2C9   | 2.24  | 2.32  | 0.0387 | 0.23 | -3.79 |
| UGT1A1   | 2.09  | 2.30  | 0.0394 | 0.23 | -3.81 |
| SLC7A9   | 1.80  | 2.30  | 0.0400 | 0.23 | -3.82 |
| SLC7A13  | 2.60  | 2.30  | 0.0401 | 0.23 | -3.82 |
| SLC25A39 | 2.54  | 2.28  | 0.0409 | 0.23 | -3.84 |
| SLC7A11  | 1.75  | 2.28  | 0.0413 | 0.23 | -3.85 |
| SLC6A18  | 1.48  | 2.27  | 0.0417 | 0.23 | -3.86 |
| SLC10A1  | 1.63  | 2.27  | 0.0422 | 0.23 | -3.87 |

|          |       |       |        |      |       |
|----------|-------|-------|--------|------|-------|
| SLC29A3  | 2.19  | 2.25  | 0.0437 | 0.23 | -3.90 |
| SLC41A3  | -2.63 | -2.24 | 0.0445 | 0.23 | -3.91 |
| SLC22A1  | 2.00  | 2.24  | 0.0447 | 0.23 | -3.92 |
| SLC9A3R1 | 2.44  | 2.23  | 0.0450 | 0.23 | -3.93 |
| SLC16A2  | 2.65  | 2.22  | 0.0458 | 0.23 | -3.94 |
| ABCC10   | 2.37  | 2.22  | 0.0458 | 0.23 | -3.94 |
| SLC25A41 | 1.55  | 2.21  | 0.0471 | 0.24 | -3.96 |
| SLC29A4  | 1.84  | 2.19  | 0.0482 | 0.24 | -3.98 |
| SLC24A4  | 2.17  | 2.19  | 0.0489 | 0.24 | -4.00 |
| SLC30A3  | -1.91 | -2.17 | 0.0505 | 0.24 | -4.03 |
| ABCC1    | 1.91  | 2.16  | 0.0509 | 0.24 | -4.03 |
| SLC18A2  | 3.20  | 2.16  | 0.0516 | 0.24 | -4.04 |
| SLC37A3  | 1.68  | 2.15  | 0.0520 | 0.24 | -4.05 |
| ABCD3    | 1.67  | 2.15  | 0.0523 | 0.24 | -4.05 |
| SLC2A12  | 2.19  | 2.11  | 0.0561 | 0.26 | -4.12 |
| SLC6A16  | 2.69  | 2.10  | 0.0573 | 0.26 | -4.14 |
| SLC35B4  | -1.33 | -2.09 | 0.0582 | 0.26 | -4.15 |
| SLC19A1  | 2.19  | 2.08  | 0.0593 | 0.26 | -4.16 |
| SLC6A1   | 1.54  | 2.07  | 0.0600 | 0.26 | -4.18 |
| SLCO4A1  | 2.00  | 2.07  | 0.0603 | 0.26 | -4.18 |
| SLC26A3  | 2.27  | 2.06  | 0.0614 | 0.27 | -4.20 |
| SLC16A14 | 1.57  | 2.05  | 0.0620 | 0.27 | -4.20 |
| ABCC5    | 1.99  | 2.04  | 0.0632 | 0.27 | -4.22 |
| SLC16A7  | 2.23  | 2.04  | 0.0638 | 0.27 | -4.23 |
| SLC39A6  | 1.38  | 2.03  | 0.0643 | 0.27 | -4.23 |
| ABCB6    | 1.71  | 2.00  | 0.0680 | 0.28 | -4.28 |
| SLC22A3  | 1.53  | 2.00  | 0.0684 | 0.28 | -4.29 |
| SLC26A4  | 1.53  | 1.98  | 0.0703 | 0.28 | -4.31 |
| SLCO5A1  | 1.90  | 1.98  | 0.0709 | 0.28 | -4.32 |
| SLC31A2  | 1.67  | 1.98  | 0.0712 | 0.28 | -4.32 |
| SLC17A7  | 1.67  | 1.97  | 0.0714 | 0.28 | -4.32 |
| ABCD4    | 1.61  | 1.96  | 0.0728 | 0.28 | -4.34 |
| SLC27A1  | 3.20  | 1.95  | 0.0744 | 0.29 | -4.36 |
| SLC39A4  | 1.52  | 1.94  | 0.0754 | 0.29 | -4.37 |
| SLC6A8   | 1.89  | 1.94  | 0.0756 | 0.29 | -4.37 |
| SLCO1C1  | 2.39  | 1.92  | 0.0785 | 0.29 | -4.40 |
| SLC9A3R2 | 1.91  | 1.92  | 0.0789 | 0.29 | -4.41 |
| SLC28A1  | 1.45  | 1.91  | 0.0802 | 0.29 | -4.42 |
| SLC23A3  | 1.86  | 1.91  | 0.0804 | 0.29 | -4.43 |
| SLC7A5   | -2.48 | -1.89 | 0.0822 | 0.30 | -4.44 |
| SLC22A14 | -2.50 | -1.88 | 0.0843 | 0.30 | -4.46 |

|          |       |       |        |      |       |
|----------|-------|-------|--------|------|-------|
| ABCB10   | -1.19 | -1.87 | 0.0855 | 0.30 | -4.48 |
| ABCB5    | 2.07  | 1.85  | 0.0881 | 0.31 | -4.50 |
| ABCA7    | 1.69  | 1.85  | 0.0890 | 0.31 | -4.51 |
| SLC25A19 | -1.22 | -1.84 | 0.0901 | 0.31 | -4.52 |
| SLC39A9  | 1.49  | 1.83  | 0.0917 | 0.32 | -4.54 |
| SLC1A3   | 1.70  | 1.83  | 0.0923 | 0.32 | -4.54 |
| SLC25A5  | -1.31 | -1.77 | 0.102  | 0.34 | -4.62 |
| SLC41A2  | 1.15  | 1.75  | 0.105  | 0.35 | -4.65 |
| SLC7A3   | 1.37  | 1.75  | 0.105  | 0.35 | -4.65 |
| SLC16A11 | 1.32  | 1.75  | 0.105  | 0.35 | -4.65 |
| SLC8A3   | 2.00  | 1.75  | 0.105  | 0.35 | -4.65 |
| SLC9A11  | 2.16  | 1.74  | 0.107  | 0.35 | -4.67 |
| GSTP1    | -1.86 | -1.74 | 0.108  | 0.35 | -4.67 |
| SLC7A1   | 1.77  | 1.71  | 0.112  | 0.36 | -4.71 |
| SLC39A8  | -1.65 | -1.71 | 0.113  | 0.36 | -4.71 |
| PPARG    | 1.80  | 1.70  | 0.114  | 0.36 | -4.72 |
| SLC6A3   | 1.97  | 1.67  | 0.120  | 0.38 | -4.76 |
| SLC9A6   | 1.48  | 1.66  | 0.122  | 0.38 | -4.77 |
| SLC15A4  | 2.02  | 1.66  | 0.122  | 0.38 | -4.77 |
| SLC2A10  | 1.24  | 1.65  | 0.124  | 0.38 | -4.79 |
| SLC24A5  | 1.60  | 1.64  | 0.126  | 0.38 | -4.80 |
| SLC9A9   | 1.28  | 1.64  | 0.126  | 0.38 | -4.80 |
| SLC37A1  | -1.91 | -1.62 | 0.130  | 0.39 | -4.83 |
| ABCB4    | 1.69  | 1.59  | 0.136  | 0.41 | -4.86 |
| SLC26A1  | 1.48  | 1.59  | 0.137  | 0.41 | -4.87 |
| SLC39A12 | 1.08  | 1.58  | 0.139  | 0.41 | -4.88 |
| SLCO1B1  | 1.15  | 1.57  | 0.141  | 0.41 | -4.89 |
| SLC6A4   | 1.15  | 1.57  | 0.142  | 0.41 | -4.89 |
| SLCO6A1  | 1.42  | 1.57  | 0.143  | 0.41 | -4.90 |
| NR1I3    | 1.22  | 1.56  | 0.144  | 0.41 | -4.91 |
| SLC22A7  | 1.11  | 1.56  | 0.144  | 0.41 | -4.91 |
| SLC38A9  | 1.28  | 1.55  | 0.146  | 0.41 | -4.92 |
| SLC12A2  | 1.51  | 1.53  | 0.150  | 0.42 | -4.94 |
| SLC22A23 | 1.89  | 1.53  | 0.152  | 0.42 | -4.95 |
| SLC4A3   | 1.97  | 1.53  | 0.152  | 0.42 | -4.95 |
| SLC12A1  | -0.91 | -1.53 | 0.152  | 0.42 | -4.95 |
| ABCG1    | 1.22  | 1.52  | 0.154  | 0.42 | -4.96 |
| SLC25A24 | 1.49  | 1.50  | 0.159  | 0.43 | -4.99 |
| SLC16A4  | -1.07 | -1.50 | 0.160  | 0.43 | -4.99 |
| SLC22A9  | -1.95 | -1.49 | 0.161  | 0.43 | -5.00 |
| SLC45A4  | 1.36  | 1.46  | 0.171  | 0.45 | -5.04 |

|          |       |       |       |      |       |
|----------|-------|-------|-------|------|-------|
| SLC36A3  | 0.92  | 1.44  | 0.175 | 0.46 | -5.06 |
| UGT2B7   | 1.31  | 1.44  | 0.175 | 0.46 | -5.06 |
| SLC1A1   | 1.47  | 1.42  | 0.180 | 0.46 | -5.08 |
| SLC35B1  | -0.92 | -1.42 | 0.181 | 0.46 | -5.09 |
| SLC7A10  | 1.90  | 1.42  | 0.181 | 0.46 | -5.09 |
| SLC22A12 | -1.76 | -1.41 | 0.183 | 0.46 | -5.10 |
| SLC26A2  | 1.18  | 1.41  | 0.184 | 0.46 | -5.10 |
| SLC26A8  | 1.12  | 1.40  | 0.187 | 0.46 | -5.11 |
| SLC7A14  | -1.30 | -1.40 | 0.187 | 0.46 | -5.11 |
| SLC25A17 | 1.29  | 1.40  | 0.187 | 0.46 | -5.12 |
| SLC17A6  | -1.37 | -1.39 | 0.188 | 0.46 | -5.12 |
| ABCC12   | 1.39  | 1.39  | 0.189 | 0.46 | -5.12 |
| SLC4A1   | -1.79 | -1.39 | 0.189 | 0.46 | -5.12 |
| SLC6A7   | 1.33  | 1.39  | 0.190 | 0.46 | -5.13 |
| SLC13A2  | 1.17  | 1.39  | 0.191 | 0.46 | -5.13 |
| SLC6A14  | 1.32  | 1.38  | 0.192 | 0.46 | -5.14 |
| SLC31A1  | -1.12 | -1.37 | 0.196 | 0.47 | -5.15 |
| SLC37A2  | 1.02  | 1.34  | 0.206 | 0.49 | -5.19 |
| SLC36A2  | -1.03 | -1.33 | 0.207 | 0.49 | -5.19 |
| SLC22A5  | 1.24  | 1.32  | 0.210 | 0.49 | -5.20 |
| SLC38A7  | -2.52 | -1.32 | 0.212 | 0.50 | -5.21 |
| SLC5A10  | 1.20  | 1.31  | 0.214 | 0.50 | -5.22 |
| ABCB9    | -0.98 | -1.30 | 0.219 | 0.51 | -5.24 |
| SLC38A8  | 1.43  | 1.29  | 0.219 | 0.51 | -5.24 |
| SLC9A4   | 2.71  | 1.29  | 0.221 | 0.51 | -5.24 |
| SLC25A28 | 1.09  | 1.27  | 0.226 | 0.52 | -5.26 |
| SLC25A44 | -1.72 | -1.26 | 0.229 | 0.52 | -5.27 |
| ABCC11   | 1.21  | 1.26  | 0.230 | 0.52 | -5.27 |
| PPARD    | 1.43  | 1.26  | 0.233 | 0.52 | -5.28 |
| SLC39A14 | 0.98  | 1.25  | 0.234 | 0.52 | -5.29 |
| SLC46A1  | 1.50  | 1.24  | 0.238 | 0.53 | -5.30 |
| SLC35F4  | 1.34  | 1.24  | 0.240 | 0.53 | -5.30 |
| SLCO1A2  | 0.98  | 1.23  | 0.242 | 0.53 | -5.31 |
| SLC39A7  | -0.93 | -1.22 | 0.244 | 0.53 | -5.32 |
| SLC27A3  | 1.10  | 1.22  | 0.245 | 0.53 | -5.32 |
| SLC1A2   | 1.32  | 1.22  | 0.246 | 0.53 | -5.32 |
| ABCG5    | -1.13 | -1.21 | 0.249 | 0.54 | -5.33 |
| NR1I2    | 0.87  | 1.20  | 0.253 | 0.54 | -5.34 |
| SLC44A2  | -1.18 | -1.19 | 0.258 | 0.55 | -5.36 |
| SLC36A4  | -0.98 | -1.18 | 0.261 | 0.55 | -5.37 |
| SLC36A1  | 0.77  | 1.17  | 0.263 | 0.55 | -5.37 |



|          |       |       |       |      |       |
|----------|-------|-------|-------|------|-------|
| SLC17A4  | 0.99  | 1.16  | 0.267 | 0.56 | -5.38 |
| ABCF2    | 0.89  | 1.16  | 0.268 | 0.56 | -5.39 |
| ABCG8    | -1.40 | -1.16 | 0.270 | 0.56 | -5.39 |
| SLC2A4   | 0.98  | 1.15  | 0.270 | 0.56 | -5.39 |
| SLC22A13 | 0.79  | 1.15  | 0.270 | 0.56 | -5.39 |
| SLC35E1  | 0.71  | 1.15  | 0.273 | 0.56 | -5.40 |
| SLC39A11 | 0.81  | 1.13  | 0.278 | 0.57 | -5.41 |
| ABCB8    | 0.88  | 1.13  | 0.279 | 0.57 | -5.41 |
| SLC45A2  | -1.68 | -1.11 | 0.287 | 0.58 | -5.43 |
| SLC25A37 | 0.86  | 1.10  | 0.294 | 0.59 | -5.45 |
| SLC27A5  | 0.74  | 1.09  | 0.298 | 0.60 | -5.46 |
| ABCF1    | 0.79  | 1.08  | 0.301 | 0.60 | -5.47 |
| SLC35A3  | 1.07  | 1.07  | 0.303 | 0.60 | -5.47 |
| SLC25A16 | 0.82  | 1.07  | 0.304 | 0.60 | -5.48 |
| SLC6A9   | 1.21  | 1.07  | 0.306 | 0.60 | -5.48 |
| SLC4A10  | -1.02 | -1.06 | 0.308 | 0.60 | -5.48 |
| SLC22A18 | 0.94  | 1.06  | 0.309 | 0.60 | -5.49 |
| SLC6A13  | 1.42  | 1.05  | 0.314 | 0.61 | -5.50 |
| SLCO3A1  | 1.13  | 1.05  | 0.315 | 0.61 | -5.50 |
| SLC25A1  | 1.29  | 1.04  | 0.317 | 0.61 | -5.51 |
| SLC45A3  | 0.98  | 1.04  | 0.319 | 0.61 | -5.51 |
| ATP7B    | 1.01  | 1.03  | 0.323 | 0.61 | -5.52 |
| SLC7A7   | 0.80  | 1.03  | 0.324 | 0.61 | -5.52 |
| SLC22A6  | -1.01 | -1.02 | 0.326 | 0.61 | -5.52 |
| SLC8A1   | 1.02  | 1.00  | 0.339 | 0.63 | -5.55 |
| SLC47A2  | 0.89  | 0.99  | 0.340 | 0.63 | -5.55 |
| ABCB1    | -0.88 | -0.99 | 0.342 | 0.63 | -5.56 |
| SLC4A5   | 0.73  | 0.98  | 0.344 | 0.64 | -5.56 |
| SLC23A2  | -1.33 | -0.98 | 0.347 | 0.64 | -5.57 |
| SLC35B2  | -0.65 | -0.98 | 0.347 | 0.64 | -5.57 |
| SLC44A5  | 0.67  | 0.98  | 0.348 | 0.64 | -5.57 |
| SLC25A32 | -0.72 | -0.96 | 0.355 | 0.64 | -5.58 |
| SLC15A3  | 0.89  | 0.96  | 0.355 | 0.64 | -5.58 |
| SLC5A7   | 0.91  | 0.95  | 0.362 | 0.65 | -5.59 |
| ABCE1    | 0.68  | 0.94  | 0.365 | 0.65 | -5.60 |
| SLC25A22 | 0.82  | 0.93  | 0.370 | 0.66 | -5.61 |
| SLC4A9   | 0.92  | 0.93  | 0.371 | 0.66 | -5.61 |
| SLC5A3   | 1.00  | 0.91  | 0.380 | 0.67 | -5.63 |
| NR3C1    | -1.18 | -0.90 | 0.388 | 0.68 | -5.64 |
| SLC9A1   | 0.76  | 0.89  | 0.389 | 0.68 | -5.64 |
| ABCC3    | -0.80 | -0.89 | 0.393 | 0.68 | -5.65 |

|          |       |       |       |      |       |
|----------|-------|-------|-------|------|-------|
| SLC26A10 | 0.63  | 0.88  | 0.394 | 0.68 | -5.65 |
| SLC6A2   | 0.80  | 0.88  | 0.396 | 0.68 | -5.65 |
| SLC5A2   | 1.11  | 0.88  | 0.397 | 0.68 | -5.66 |
| SLC24A6  | -1.33 | -0.88 | 0.398 | 0.68 | -5.66 |
| SLCO1B3  | 0.74  | 0.87  | 0.399 | 0.68 | -5.66 |
| SLC25A14 | -0.80 | -0.87 | 0.401 | 0.68 | -5.66 |
| SLC16A1  | -0.89 | -0.87 | 0.403 | 0.68 | -5.66 |
| SLC35E2  | -0.65 | -0.86 | 0.404 | 0.68 | -5.67 |
| SLC35C2  | 0.74  | 0.86  | 0.408 | 0.69 | -5.67 |
| SLC20A2  | 0.64  | 0.85  | 0.412 | 0.69 | -5.68 |
| SLC5A11  | -0.78 | -0.85 | 0.412 | 0.69 | -5.68 |
| SLC6A17  | -0.63 | -0.85 | 0.413 | 0.69 | -5.68 |
| SLC42A3  | 0.98  | 0.85  | 0.414 | 0.69 | -5.68 |
| SLCO2B1  | 1.11  | 0.84  | 0.418 | 0.69 | -5.69 |
| SLC1A4   | -1.07 | -0.84 | 0.419 | 0.69 | -5.69 |
| SLC5A1   | -0.98 | -0.83 | 0.423 | 0.69 | -5.70 |
| SLC2A1   | 1.03  | 0.82  | 0.428 | 0.70 | -5.70 |
| GSTT1    | 1.48  | 0.82  | 0.430 | 0.70 | -5.71 |
| CYP3A5   | -0.73 | -0.81 | 0.433 | 0.70 | -5.71 |
| SLC38A3  | 0.64  | 0.78  | 0.448 | 0.72 | -5.73 |
| SLC25A3  | 0.62  | 0.77  | 0.455 | 0.73 | -5.74 |
| SLC15A1  | 1.35  | 0.77  | 0.457 | 0.73 | -5.74 |
| SLC29A2  | -1.01 | -0.76 | 0.459 | 0.73 | -5.75 |
| SLC6A15  | -0.67 | -0.76 | 0.459 | 0.73 | -5.75 |
| SLC6A20  | -0.79 | -0.76 | 0.459 | 0.73 | -5.75 |
| SLC17A1  | -0.75 | -0.76 | 0.461 | 0.73 | -5.75 |
| SLC38A10 | 0.79  | 0.75  | 0.467 | 0.73 | -5.76 |
| ABCG4    | 0.87  | 0.75  | 0.469 | 0.73 | -5.76 |
| SLC43A2  | 1.04  | 0.74  | 0.470 | 0.73 | -5.76 |
| ABCB7    | -0.46 | -0.73 | 0.481 | 0.75 | -5.77 |
| SLC35D2  | 0.84  | 0.72  | 0.482 | 0.75 | -5.77 |
| SLC25A26 | -0.70 | -0.72 | 0.482 | 0.75 | -5.77 |
| SLC4A7   | 0.67  | 0.71  | 0.490 | 0.75 | -5.78 |
| SLC38A5  | 0.53  | 0.71  | 0.492 | 0.75 | -5.79 |
| SLC45A1  | -0.69 | -0.70 | 0.495 | 0.76 | -5.79 |
| SLC17A5  | -1.10 | -0.70 | 0.497 | 0.76 | -5.79 |
| SLC2A8   | -1.11 | -0.69 | 0.501 | 0.76 | -5.80 |
| SLC46A2  | 0.51  | 0.68  | 0.508 | 0.77 | -5.80 |
| SLC9A2   | 0.67  | 0.68  | 0.508 | 0.77 | -5.80 |
| SLC12A3  | -0.42 | -0.68 | 0.510 | 0.77 | -5.81 |
| NAT1     | 0.57  | 0.67  | 0.513 | 0.77 | -5.81 |

|          |       |       |       |      |       |
|----------|-------|-------|-------|------|-------|
| SLC44A4  | -0.48 | -0.67 | 0.514 | 0.77 | -5.81 |
| SLC12A5  | 0.67  | 0.67  | 0.517 | 0.77 | -5.81 |
| NR1H2    | -0.98 | -0.66 | 0.524 | 0.77 | -5.82 |
| SLC5A8   | 0.68  | 0.65  | 0.526 | 0.77 | -5.82 |
| SLC25A6  | 0.47  | 0.65  | 0.529 | 0.77 | -5.83 |
| SLC25A18 | -0.78 | -0.65 | 0.529 | 0.77 | -5.83 |
| SLC35A2  | -0.68 | -0.65 | 0.529 | 0.77 | -5.83 |
| ABCC6    | 0.60  | 0.65  | 0.530 | 0.77 | -5.83 |
| SLC4A4   | 0.66  | 0.65  | 0.531 | 0.77 | -5.83 |
| RARA     | -0.53 | -0.64 | 0.534 | 0.77 | -5.83 |
| SLC19A3  | -0.58 | -0.63 | 0.538 | 0.77 | -5.83 |
| SLC40A1  | 0.49  | 0.63  | 0.541 | 0.77 | -5.84 |
| SLC22A25 | 0.74  | 0.63  | 0.543 | 0.77 | -5.84 |
| SLC16A8  | 0.52  | 0.62  | 0.544 | 0.77 | -5.84 |
| SLC22A4  | 0.47  | 0.62  | 0.544 | 0.77 | -5.84 |
| SLC10A4  | 0.68  | 0.62  | 0.547 | 0.77 | -5.84 |
| SLC30A8  | 0.49  | 0.62  | 0.548 | 0.77 | -5.84 |
| SLC38A1  | -0.48 | -0.62 | 0.549 | 0.77 | -5.84 |
| SLC4A8   | -0.66 | -0.61 | 0.550 | 0.77 | -5.85 |
| SLC30A7  | 0.61  | 0.61  | 0.552 | 0.77 | -5.85 |
| SLC13A3  | 0.72  | 0.61  | 0.552 | 0.77 | -5.85 |
| ABCC9    | -0.67 | -0.60 | 0.556 | 0.77 | -5.85 |
| SLC25A9  | -0.50 | -0.58 | 0.571 | 0.79 | -5.87 |
| SLC48A1  | 0.42  | 0.58  | 0.574 | 0.79 | -5.87 |
| SLC38A4  | 0.66  | 0.57  | 0.582 | 0.80 | -5.87 |
| ABCA6    | -0.66 | -0.56 | 0.583 | 0.80 | -5.88 |
| SLC12A9  | 0.48  | 0.55  | 0.591 | 0.81 | -5.88 |
| SLC22A17 | -0.39 | -0.54 | 0.597 | 0.81 | -5.89 |
| SLC3A2   | 0.52  | 0.53  | 0.606 | 0.82 | -5.89 |
| SLC25A20 | -0.53 | -0.52 | 0.610 | 0.82 | -5.90 |
| SLC47A1  | -0.45 | -0.52 | 0.611 | 0.82 | -5.90 |
| SLC10A5  | 0.40  | 0.51  | 0.620 | 0.83 | -5.91 |
| SLC9A10  | -0.50 | -0.51 | 0.622 | 0.83 | -5.91 |
| SLC25A45 | -0.43 | -0.50 | 0.623 | 0.83 | -5.91 |
| SLC27A6  | -0.39 | -0.49 | 0.630 | 0.84 | -5.91 |
| SLC25A2  | 0.32  | 0.49  | 0.634 | 0.84 | -5.92 |
| SLC25A23 | -0.35 | -0.48 | 0.637 | 0.84 | -5.92 |
| SLC5A12  | 0.76  | 0.48  | 0.638 | 0.84 | -5.92 |
| SLC25A25 | 0.36  | 0.48  | 0.643 | 0.84 | -5.92 |
| SLC35A5  | 0.30  | 0.47  | 0.643 | 0.84 | -5.92 |
| SLC25A10 | 0.46  | 0.47  | 0.649 | 0.84 | -5.93 |

|          |       |       |       |      |       |
|----------|-------|-------|-------|------|-------|
| SLC12A4  | -0.77 | -0.46 | 0.655 | 0.84 | -5.93 |
| CYP1A1   | 0.79  | 0.46  | 0.656 | 0.84 | -5.93 |
| SLC35C1  | -0.29 | -0.46 | 0.657 | 0.84 | -5.93 |
| CYP2B6   | 0.68  | 0.46  | 0.657 | 0.84 | -5.93 |
| SLC34A2  | -0.31 | -0.45 | 0.659 | 0.84 | -5.93 |
| ABCA1    | -0.43 | -0.45 | 0.660 | 0.84 | -5.93 |
| ABCC2    | 0.59  | 0.45  | 0.662 | 0.85 | -5.93 |
| SLC9A8   | -0.42 | -0.44 | 0.666 | 0.85 | -5.94 |
| ABCB11   | 0.36  | 0.43  | 0.672 | 0.85 | -5.94 |
| SLC25A4  | 0.38  | 0.43  | 0.674 | 0.85 | -5.94 |
| SLC22A2  | -0.37 | -0.43 | 0.675 | 0.85 | -5.94 |
| SLC17A2  | 0.40  | 0.42  | 0.679 | 0.85 | -5.94 |
| ABCA5    | -0.42 | -0.42 | 0.681 | 0.85 | -5.95 |
| NR5A2    | -0.52 | -0.41 | 0.690 | 0.86 | -5.95 |
| ABCA12   | 0.28  | 0.41  | 0.691 | 0.86 | -5.95 |
| SLC25A46 | -0.35 | -0.40 | 0.695 | 0.86 | -5.95 |
| SLC16A5  | -0.24 | -0.40 | 0.699 | 0.87 | -5.96 |
| SLC2A9   | -0.54 | -0.39 | 0.704 | 0.87 | -5.96 |
| CYP3A4   | 0.31  | 0.38  | 0.710 | 0.87 | -5.96 |
| SLC23A1  | -0.44 | -0.38 | 0.711 | 0.87 | -5.96 |
| SLC25A11 | 0.27  | 0.38  | 0.714 | 0.87 | -5.96 |
| SLC30A4  | -0.38 | -0.37 | 0.716 | 0.87 | -5.97 |
| SLC35F2  | -0.24 | -0.36 | 0.721 | 0.87 | -5.97 |
| SLC16A13 | -0.32 | -0.36 | 0.724 | 0.87 | -5.97 |
| SLC30A6  | 0.39  | 0.36  | 0.725 | 0.87 | -5.97 |
| SLCO2A1  | 0.55  | 0.36  | 0.725 | 0.87 | -5.97 |
| SLC14A2  | 0.42  | 0.36  | 0.727 | 0.87 | -5.97 |
| SLC4A2   | -0.50 | -0.35 | 0.730 | 0.88 | -5.97 |
| SLC25A29 | -0.30 | -0.35 | 0.734 | 0.88 | -5.97 |
| SLC30A2  | 0.29  | 0.34  | 0.739 | 0.88 | -5.98 |
| SLC5A9   | 0.30  | 0.34  | 0.742 | 0.88 | -5.98 |
| SLC5A6   | -0.21 | -0.33 | 0.745 | 0.88 | -5.98 |
| SLC22A11 | -0.25 | -0.33 | 0.748 | 0.88 | -5.98 |
| SLC29A1  | 0.37  | 0.33  | 0.750 | 0.89 | -5.98 |
| SLC12A7  | 0.30  | 0.32  | 0.752 | 0.89 | -5.98 |
| SLC7A6   | -0.23 | -0.31 | 0.758 | 0.89 | -5.99 |
| ABCD1    | 0.21  | 0.31  | 0.765 | 0.90 | -5.99 |
| SLC43A1  | -0.25 | -0.30 | 0.768 | 0.90 | -5.99 |
| SLC5A4   | 0.63  | 0.30  | 0.772 | 0.90 | -5.99 |
| SLC43A3  | 0.44  | 0.28  | 0.786 | 0.91 | -6.00 |
| SLC26A6  | -0.26 | -0.28 | 0.787 | 0.91 | -6.00 |

|               |       |       |       |      |       |
|---------------|-------|-------|-------|------|-------|
| SLC25A12      | -0.21 | -0.28 | 0.787 | 0.91 | -6.00 |
| SLC24A1       | -0.26 | -0.27 | 0.790 | 0.91 | -6.00 |
| SULT1A1       | -0.43 | -0.27 | 0.795 | 0.91 | -6.00 |
| SLC44A1       | 0.30  | 0.26  | 0.796 | 0.91 | -6.00 |
| SLCO4C1       | -0.29 | -0.26 | 0.797 | 0.91 | -6.00 |
| SLC30A9       | 0.23  | 0.26  | 0.798 | 0.91 | -6.00 |
| SLC22A2splice | -0.41 | -0.25 | 0.810 | 0.91 | -6.01 |
| CYP2C8        | 0.30  | 0.24  | 0.813 | 0.91 | -6.01 |
| SLC14A1       | -0.33 | -0.24 | 0.814 | 0.91 | -6.01 |
| SLC25A27      | 0.21  | 0.24  | 0.815 | 0.91 | -6.01 |
| SLC25A36      | 0.19  | 0.24  | 0.816 | 0.91 | -6.01 |
| SLC9A7        | -0.35 | -0.23 | 0.819 | 0.91 | -6.01 |
| ATP1A1        | 0.32  | 0.23  | 0.820 | 0.91 | -6.01 |
| ARNT          | 0.32  | 0.23  | 0.821 | 0.91 | -6.01 |
| SLC26A11      | 0.32  | 0.22  | 0.827 | 0.92 | -6.01 |
| SLC16A10      | 0.17  | 0.22  | 0.833 | 0.92 | -6.01 |
| SLC22A8       | -0.19 | -0.21 | 0.837 | 0.92 | -6.01 |
| SLC16A6       | 0.21  | 0.21  | 0.838 | 0.92 | -6.01 |
| SLC17A8       | -0.17 | -0.21 | 0.841 | 0.92 | -6.01 |
| SLC7A4        | 0.19  | 0.20  | 0.843 | 0.92 | -6.02 |
| SLC38A2       | -0.17 | -0.20 | 0.845 | 0.92 | -6.02 |
| SLC2A2        | 0.18  | 0.19  | 0.856 | 0.93 | -6.02 |
| SLC25A13      | 0.18  | 0.18  | 0.857 | 0.93 | -6.02 |
| SLC34A3       | 0.13  | 0.18  | 0.863 | 0.94 | -6.02 |
| SLC35A1       | -0.10 | -0.17 | 0.869 | 0.94 | -6.02 |
| SLC38A6       | -0.29 | -0.16 | 0.879 | 0.95 | -6.02 |
| SLC25A15      | -0.17 | -0.13 | 0.896 | 0.96 | -6.03 |
| SLC9A5        | 0.15  | 0.13  | 0.897 | 0.96 | -6.03 |
| SLC44A3       | 0.13  | 0.13  | 0.899 | 0.96 | -6.03 |
| SLC10A3       | 0.10  | 0.12  | 0.906 | 0.96 | -6.03 |
| SLC39A1       | 0.10  | 0.12  | 0.907 | 0.96 | -6.03 |
| CYP2D6        | -0.08 | -0.12 | 0.908 | 0.96 | -6.03 |
| SLC18A3       | 0.11  | 0.12  | 0.910 | 0.96 | -6.03 |
| SLC34A1       | 0.09  | 0.11  | 0.911 | 0.96 | -6.03 |
| CYP1A2        | -0.13 | -0.11 | 0.914 | 0.96 | -6.03 |
| SLC35F3       | 0.08  | 0.11  | 0.917 | 0.96 | -6.03 |
| ATP7A         | 0.14  | 0.10  | 0.920 | 0.96 | -6.03 |
| SLC28A2       | -0.13 | -0.10 | 0.921 | 0.96 | -6.03 |
| SLC37A4       | -0.11 | -0.10 | 0.922 | 0.96 | -6.03 |
| ABCC7         | -0.08 | -0.10 | 0.925 | 0.96 | -6.03 |
| SLC6A11       | -0.10 | -0.09 | 0.932 | 0.97 | -6.03 |

|          |       |       |       |      |       |
|----------|-------|-------|-------|------|-------|
| PPARA    | 0.10  | 0.08  | 0.936 | 0.97 | -6.03 |
| SLC33A1  | 0.05  | 0.07  | 0.942 | 0.97 | -6.03 |
| NR1H4    | -0.08 | -0.07 | 0.949 | 0.98 | -6.03 |
| SLC3A1   | 0.04  | 0.06  | 0.953 | 0.98 | -6.03 |
| SLC24A3  | -0.07 | -0.06 | 0.953 | 0.98 | -6.03 |
| ABCA10   | 0.04  | 0.04  | 0.967 | 0.99 | -6.04 |
| SLC9A3   | 0.04  | 0.04  | 0.969 | 0.99 | -6.04 |
| SLC39A5  | 0.05  | 0.04  | 0.969 | 0.99 | -6.04 |
| SLC35F1  | 0.03  | 0.03  | 0.976 | 0.99 | -6.04 |
| SLC25A30 | -0.01 | -0.02 | 0.983 | 1.00 | -6.04 |
| RARB     | 0.02  | 0.02  | 0.984 | 1.00 | -6.04 |
| SLC42A2  | -0.02 | -0.02 | 0.986 | 1.00 | -6.04 |
| SLC25A21 | 0.01  | 0.01  | 0.989 | 1.00 | -6.04 |
| SLC25A34 | 0.01  | 0.01  | 0.993 | 1.00 | -6.04 |
| PGR      | 0.01  | 0.01  | 0.995 | 1.00 | -6.04 |
| SLC6A12  | 0.00  | 0.00  | 0.999 | 1.00 | -6.04 |

Supplemental Table S4. Correlation of Selected Transporters With Ocular Disease States

| Organism/<br>Cell Line | Condition/Phenotype              | Effect on Expression* or<br>Relationship to Disease |               |               |               | Comment                                  | References |
|------------------------|----------------------------------|-----------------------------------------------------|---------------|---------------|---------------|------------------------------------------|------------|
|                        |                                  | BCRP/<br>Bcrp                                       | MRP4/<br>Mrp4 | OCT3/<br>Oct3 | OAT2/<br>Oat2 |                                          |            |
| Mouse                  | Oxygen-induced<br>retinopathy    | R                                                   | R             |               |               |                                          | [29]       |
| Human                  | Retinoblastoma                   | ND                                                  | ND            |               |               |                                          | [101]      |
| HRECs                  | Retinal angiogenesis             |                                                     | R             |               |               |                                          | [102]      |
| Human                  | Age-related cortical<br>cataract |                                                     |               |               | A             | in LD with<br>candidate<br>disease locus | [103]      |
| Human                  | Retinal cone dystrophy           |                                                     |               | A             |               | in LD with<br>candidate<br>disease locus | [103]      |

\*as compared to reference/normal tissue

R=reduced; A=associated; ND=not detected

# Supplemental Figure S1

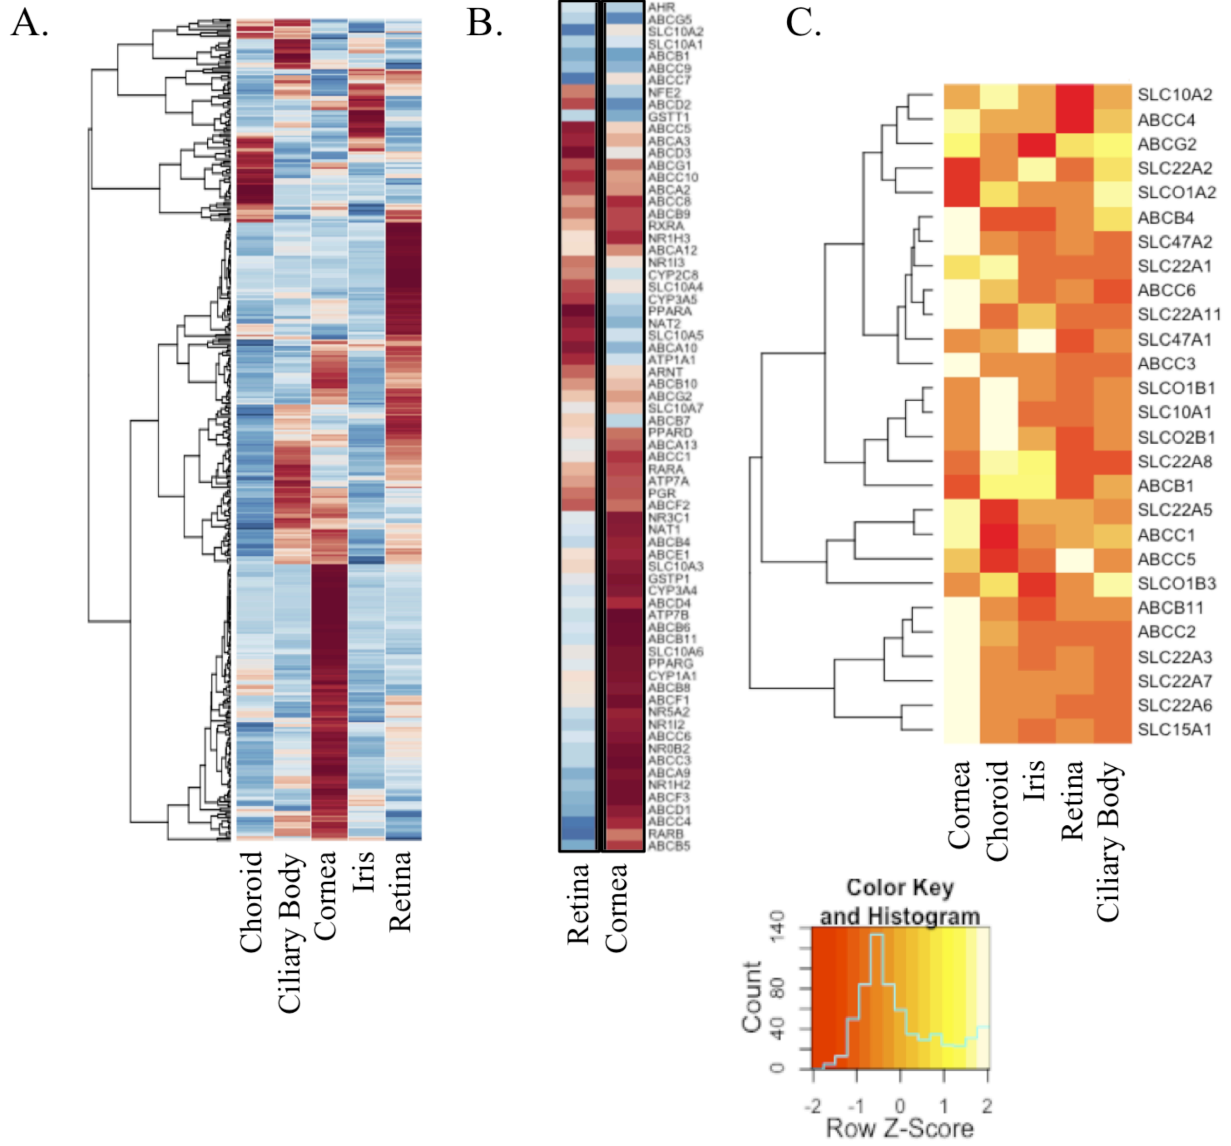



Supplemental Figure S2

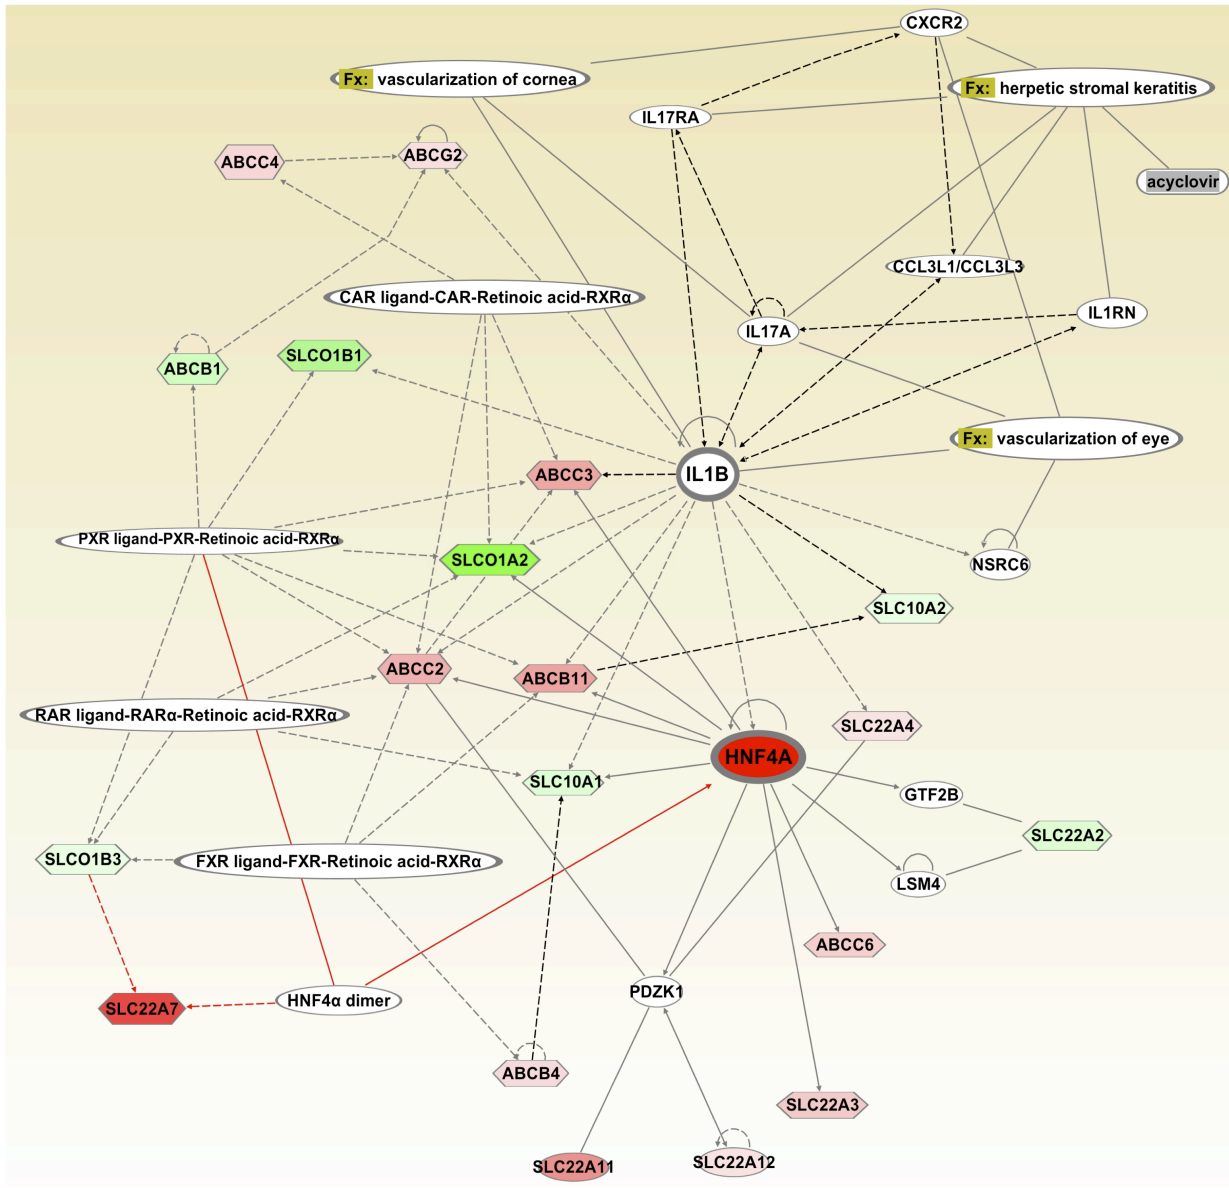

## Supplemental Figure S3

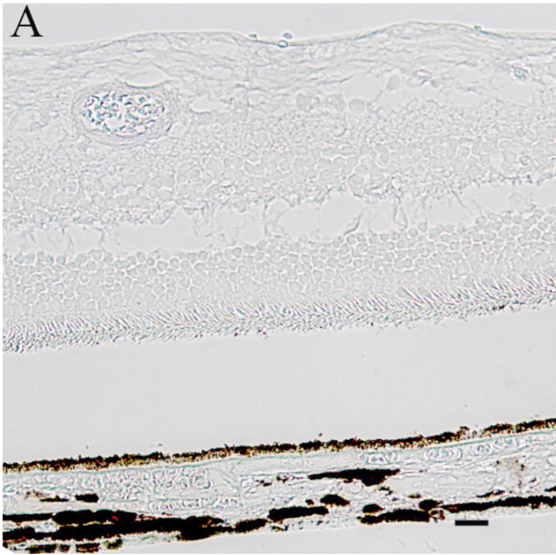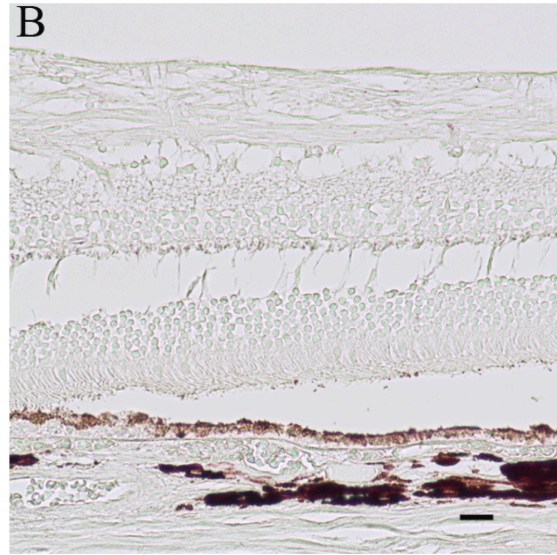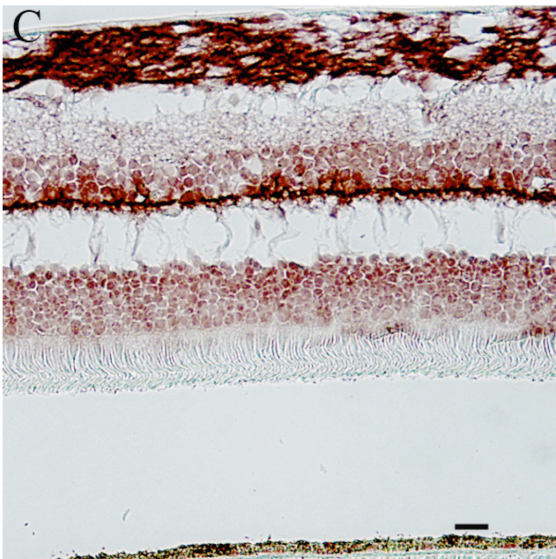

Supplement: NIHMS438970-supplement-1_si_001.pdf [file NIHMS438970-supplement-1_si_001.pdf]
